# Supplementary material for: Uncovering miRNA–mRNA Regulatory Networks Related to Olaparib Resistance and Resensitization of BRCA2MUT Ovarian Cancer PEO1-OR Cells with the ATR/CHK1 Pathway Inhibitors
Source: MDPI journal article supplement (doi:10.3390/cells13100867), 2024-05-17
Supplement: s1 [file s1]

# SUPPLEMENTARY INFORMATION

## Uncovering miRNA-mRNA regulatory networks related to olaparib resistance and resensitization of *BRCA2*<sup>MUT</sup> ovarian cancer PEO1-OR cells with the ATR/CHK1 pathway inhibitors

Łukasz Biegała<sup>1,2</sup>, Damian Kołat<sup>3,4</sup>, Arkadiusz Gajek<sup>1</sup>, Elżbieta Płuciennik<sup>3</sup>, Agnieszka Marczak<sup>1</sup>,  
Agnieszka Śliwińska<sup>5,\*</sup>, Michał Mikula<sup>6</sup>, Aneta Rogalska<sup>1,\*</sup>

### TABLE OF CONTENTS

#### ► **Supplementary Methods:**

Screening of endogenous control genes for qPCR studies with Custom TaqMan™ Array MicroRNA Cards.

#### ► **Supplementary Data:**

Identification of endogenous controls for use with custom TaqMan™ Array MicroRNA Cards.

#### ► **Supplementary Figures:**

**Figure S1:** Network of miRNA-target interactions created with the MIENTURNET tool for dysregulated miRNAs identified from screening analysis with pre-designed TaqMan™ Array MicroRNA Cards and pre-selected for further validation.

**Figure S2:** Selection of candidate endogenous control genes with the RefFinder tool based on results from Pre-designed TaqMan™ Array MicroRNA Cards for further RT-qPCR studies with Custom TaqMan™ Array MicroRNA Cards.

**Figure S3:** Validation of endogenous control genes stable expression in HGSOC cell lines for RT-qPCR data normalization from Custom TaqMan™ MicroRNA Cards.

**Figure S4:** Results of RT-qPCR-based differential miRNA basal expression analysis in untreated PEO1, PEO1-OR, and PEO4 cell lines after 2 days of cell culture (Custom TaqMan™ MicroRNA Cards).

**Figure S5:** Results of RT-qPCR-based differential miRNA expression analysis in PEO1 cell line incubated with olaparib (O), ATRi (A), CHK1i (C), or their combinations for 2 days (Custom TaqMan™ MicroRNA Cards).

**Figure S6:** Results of RT-qPCR-based differential miRNA expression analysis in PEO1-OR cell line incubated with olaparib (O), ATRi (A), CHK1i (C), or their combinations for 2 days (Custom TaqMan™ MicroRNA Cards).

**Figure S7:** Results of RT-qPCR-based differential miRNA expression analysis in PEO4 cell line incubated with olaparib (O), ATRi (A), CHK1i (C), or their combinations for 2 days (Custom TaqMan™ MicroRNA Cards).

**Figure S8:** Network-based functional enrichment analyses of significantly differentially expressed miRNAs and their target genes in PEO1 cell line incubated with olaparib combinations for 2 days.

**Figure S9:** Results of semi-quantitative analysis with antibody microarrays for growth factors with significantly dysregulated expression in PEO1 cells (absolute fold change  $\geq 1.5$ ,  $p < 0.05$ ).

**Figure S10:** Raw results of semi-quantitative analysis of 41 growth factors expression in PEO1 and PEO1-OR cells incubated with tested inhibitors or their combinations for 2 days.

**Figure S11:** Kaplan-Meier plots showing the relationship between miRNAs and clinical endpoints (OS – overall survival, PFI – progression-free intervals) in serous OC patients.

**Figure S12:** Kaplan-Meier plots showing the relationship between target genes and clinical endpoints (OS – overall survival, PFI – progression-free intervals) in serous OC patients.

**Figure S13:** Kaplan-Meier plots showing the relationship between target genes and clinical endpoints (OS – overall survival, PFI – progression-free intervals) in serous OC patients (continued).

► **Supplementary Tables:**

**Table S1:** List of key reagents used in the study.

**Table S2:** Selection of 44 out of 69 dysregulated miRNAs for validation on Custom TaqMan™ MicroRNA Cards based on bioinformatics analyses and literature review.

**Table S3:** List of analyzed miRNAs and small RNAs for miRNA validation with Custom TaqMan™ MicroRNA Cards.

**Table S4:** Average fold change values of significantly differentially expressed miRNAs in HGSOC cell lines with (Custom TaqMan™ MicroRNA Cards).

**Table S5:** Top significantly enriched pathways (Reactome) and biological processes (GO:BP) associated with target genes of dysregulated miRNAs in untreated PEO1-OR cells.

**Table S6:** Top significantly enriched pathways (Reactome) associated with target genes of dysregulated miRNAs in PEO1-OR cells in response to combinations of olaparib with the ATR/CHK1 pathway inhibitors.

**Table S7:** Experimentally validated targets of differentially expressed miRNAs from minimal subnetworks that maximally connect seeds in the PEO1-OR cell line (established with miRNet 2.0).

**Table S8:** Identification of hub nodes using CytoHubba plug-in based on the minimal miRNA-mRNA networks using maximal clique centrality (MCC) algorithm.

**Table S9:** Results of stage-wise differential miRNA and gene expression analysis in serous OC patients using filtered data from TCGA-OV dataset (serous OC patients with stage II, III, or IV after pharmaceutical therapy).

**Table S10:** Validation of endogenous control genes stable expression in HGSOC cell lines for RT-qPCR data normalization from Custom TaqMan™ MicroRNA Cards.

## SUPPLEMENTARY METHODS

---

### **Screening and validation of endogenous control genes for qPCR studies with Custom TaqMan™ Array MicroRNA Cards**

The global mean normalization method, used to normalize data from RT-qPCR miRNA profiling studies with Pre-designed TaqMan™ Array MicroRNA Cards, is accurate in studies where many miRNAs are tested per sample. Custom TaqMan™ Array MicroRNA Cards contain one assay for U6 snRNA as a common candidate endogenous control gene by default. To identify additional stably expressed genes for data normalization before the design of Custom TaqMan™ Array MicroRNA Cards for 44 target miRNAs, we screened for two more reference genes based on the results from global miRNA profiling studies for 754 miRNAs. Firstly, raw  $C_T$  data from screening experiments was filtered to consider miRNAs which were reliably detected in all untreated and treated samples in PEO1 and PEO1-OR cells ( $C_T$  value < 35) and were abundantly expressed in both cell lines (average  $C_T$  value < 28). Briefly, suitable reference genes were identified based on gene stability rankings calculated with the RefFinder web-based tool. This algorithm allows the computation of the overall final ranking based on weights calculated with four different programs (geNorm, NormFinder, BestKeeper, and the comparative  $\Delta C_T$  method). Genes were prioritized according to the highest geometric mean of weights for the final rankings (stability), lowest  $C_T$  value (expression level), and lowest standard deviations of  $C_T$  (variability among groups). One gene for small RNA (RNU48 snoRNA) and one for miRNA (miRNA-30e-3p) with the highest expression stability, lowest standard deviation among groups, and highest expression level (lowest  $C_T$ ) were selected as additional candidates for reference genes in further quantitative RT-qPCR analyses.

## SUPPLEMENTARY DATA

---

### Identification of endogenous controls for use with custom TaqMan™ Array MicroRNA Cards

Small-scale miRNA gene expression studies should be preceded by a selection of the most stable small RNA controls for accurate normalization of miRNA expression data. Traditional use of a single gene for normalization might lead to relatively substantial errors. Hence, we used prior RT-qPCR data from large-scale miRNA profiling with predesigned TaqMan™ Array MicroRNA Cards to identify three reliable endogenous controls for use in normalization by multiple housekeeping genes with Custom Cards. We initially confirmed the stability of candidate endogenous control introduced on cards by default (U6 snRNA) and recommended by the manufacturer (RNU48) in both PEO1 and PEO1-OR cells. Comparison of a geometric mean of ranking values from RefFinder, average  $C_T$  values, and standard deviation of  $C_T$  for genes included in the analysis are presented in Figure S2. Out of all included miRNAs, we have evaluated 11 miRNAs meeting the inclusion criteria. miR-30e-3p was selected as the most stably and relatively abundantly expressed miRNA upon tested treatment conditions based on summed gene stability ranking evaluated with RefFinder tool, calculated average  $C_T$  values and its average standard deviation ( $C_T = 26.7 \pm 0.17$ ) in both PEO1 and PEO1-OR cells (Figure S2).

Three pre-selected endogenous control genes (U6 snRNA, RNU48 snoRNA, and miR-30e-3p) were evaluated for stable expression across treatment conditions in PEO1, PEO4, and PEO1-OR cell lines to confirm their stability in the final qPCR-based miRNA quantification experiments with Custom TaqMan™ Array MicroRNA Cards. The average  $C_T$  values and standard deviation of  $C_T$  and average  $C_T$  range across treatments in all HGSOC cell lines (Table S10) for all three endogenous control genes were used as a direct measure of the stability of these genes.

The low variation of expression values ( $C_T$  range of 0.19 – 0.67 and SD of average  $C_T$  of 0.08 – 0.22) indicated a very small dispersion among samples under studied treatment conditions (Table 2).  $C_T$  values for each group were presented on graphs in Figure S3. Comparison of  $C_T$  means among untreated and treated groups in all HGSOC cell lines showed no statistically significant difference for endogenous control gene expression (Table S10 and Figure S3). Hence, a multiple reference gene normalization strategy was applied to normalize RT-qPCR miRNA expression data for 44 target miRNAs.

## SUPPLEMENTARY FIGURES

### Supplementary Figure 1 (Figure S1)

a

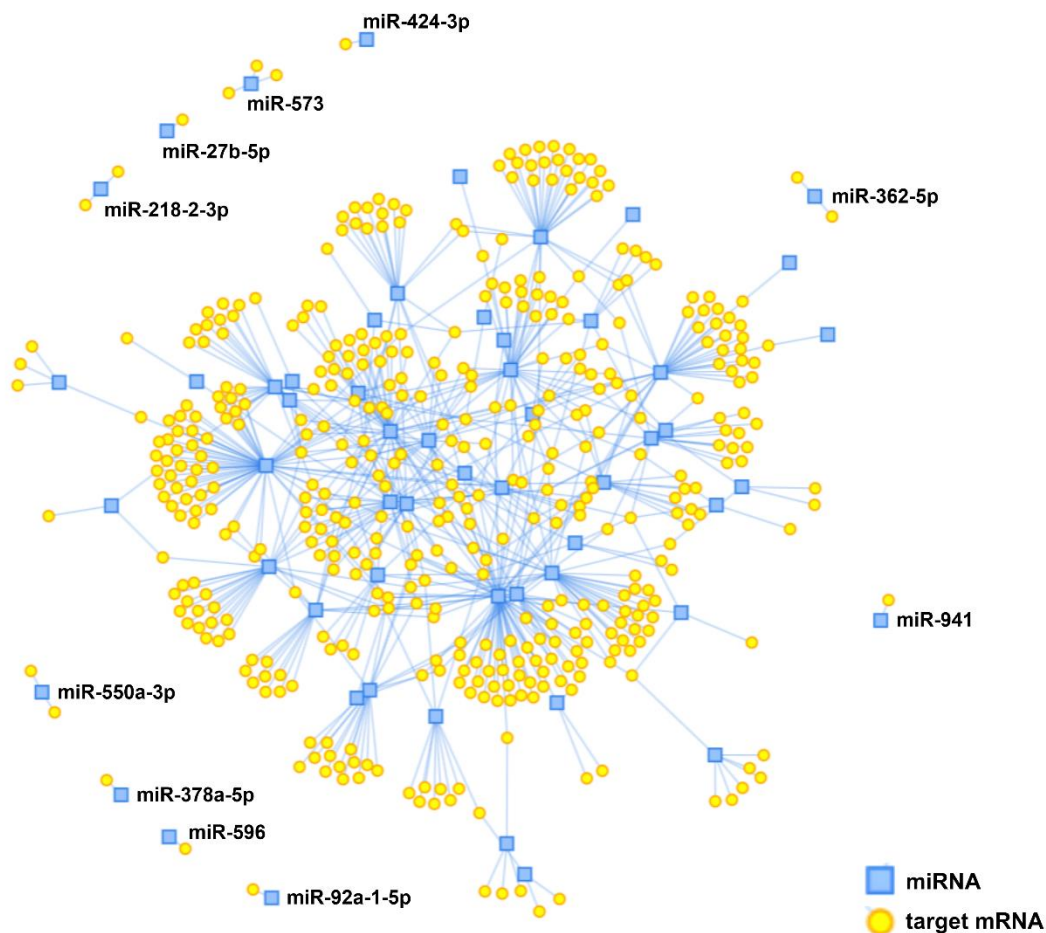

b

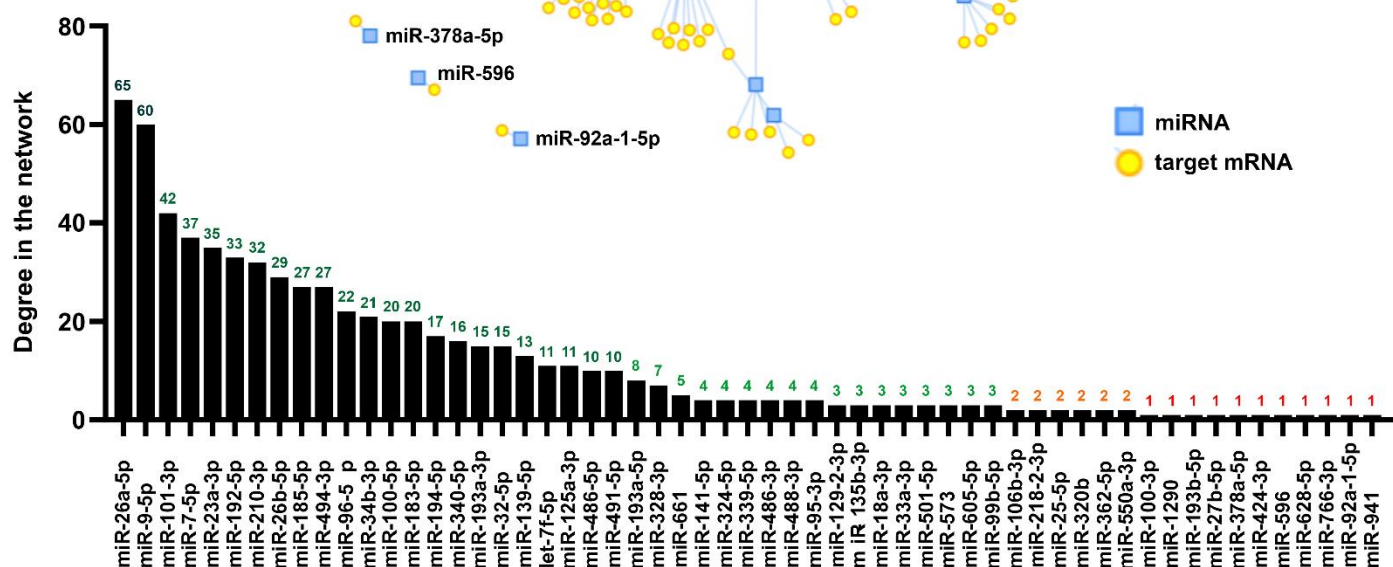

**Figure S1. Network of miRNA-target interactions created with the MIENTURNET tool for dysregulated miRNAs identified from screening analysis with pre-designed TaqMan™ Array MicroRNA Cards and pre-selected for further validation. (a)** Visualization of miRNA-target interaction network. Blue squares refer to miRNAs, while yellow circles refer to their target genes. miRNA not connected with the network were highlighted by their names. **(b)** Bar plot representing network degree for miRNAs.

## Supplementary Figure 2 (Figure S2)

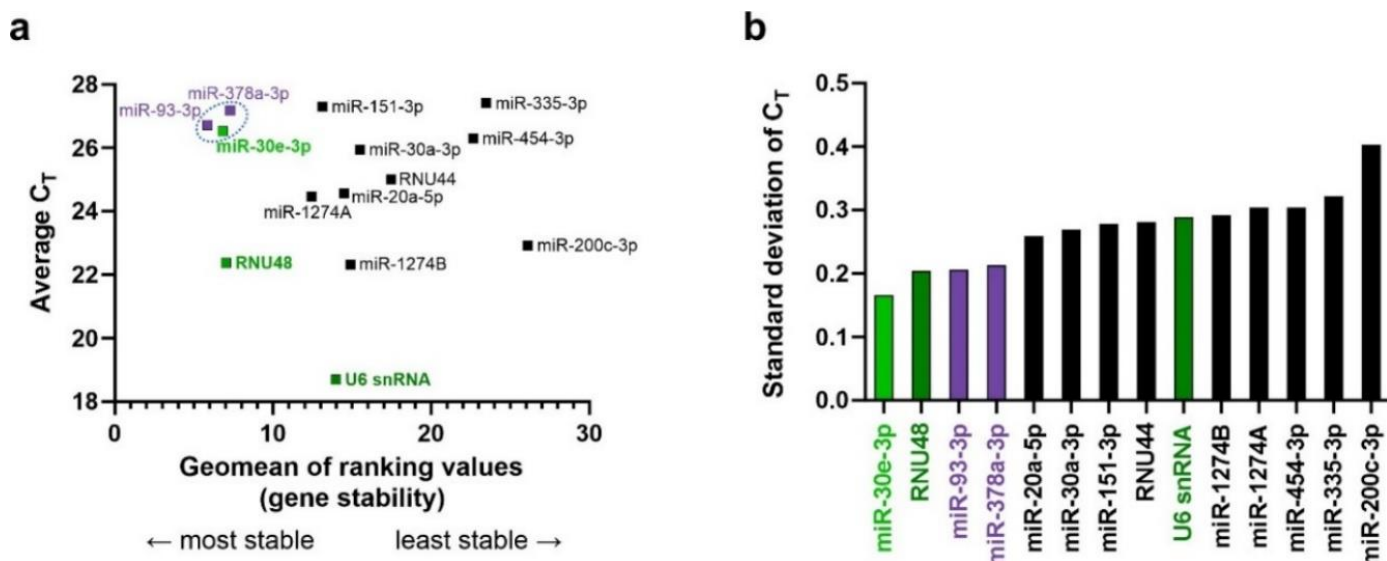

**Figure S2. Selection of candidate endogenous control genes with the RefFinder tool based on results from Pre-designed TaqMan™ Array MicroRNA Cards for further RT-qPCR studies with Custom TaqMan™ Array MicroRNA Cards.** Raw  $C_T$  values for each MicroRNA or gene were used to identify the most stable reference genes among groups in untreated and treated PEO1 and PEO1-OR cells. One small RNA from each class (snRNA, snoRNA, and miRNA) was selected as a reference gene. U6 snRNA is a fixed endogenous control introduced on TLDA Cards by the manufacturer. **(a)** Evaluation of candidate gene expression stability based on their geometric mean of ranking values calculated with RefFinder (x-axis) and average  $C_T$  values (expression level on y-axis). Undetected miRNAs in any group ( $C_T \geq 35$ ) and detected miRNAs with low expression among groups ( $C_T \geq 28$ ) were excluded from the analysis. The remaining miRNAs were used to evaluate their stability using the RefFinder web-based tool. Reference genes were prioritized according to their stability rankings derived from the four programs (geNorm, NormFinder, BestKeeper, and the comparative  $\Delta C_T$  method). Geomean of ranking values is a sum of values calculated separately for PEO1 and PEO1-OR cells. Averaged  $C_T$  is a mean value calculated separately for PEO1 and PEO1-OR cells. RNU48 exhibited the highest stability among the two analyzed snRNAs and was selected as the second reference gene. Among all analyzed miRNAs, three showed the highest gene stability and similarly modern expression levels ( $C_T$  from 26.7 – 27.2): miR-30e-3p, miR93-3p, and miR-378a-3p (marked with a blue oval). **(b)** The average standard deviation of  $C_T$  values for miRNAs among groups was used to select miRNA with the lowest expression variability. Out of three miRNAs pre-selected with RefFinder (miR-30e-3p, miR93-3p, and miR-378a-3p), miR-30e-3p expression was the most consistent among groups (SD = 0.17). Moreover, it showed the lowest average  $C_T$  and it was selected as the third reference gene.

### Supplementary Figure 3 (Figure S3)

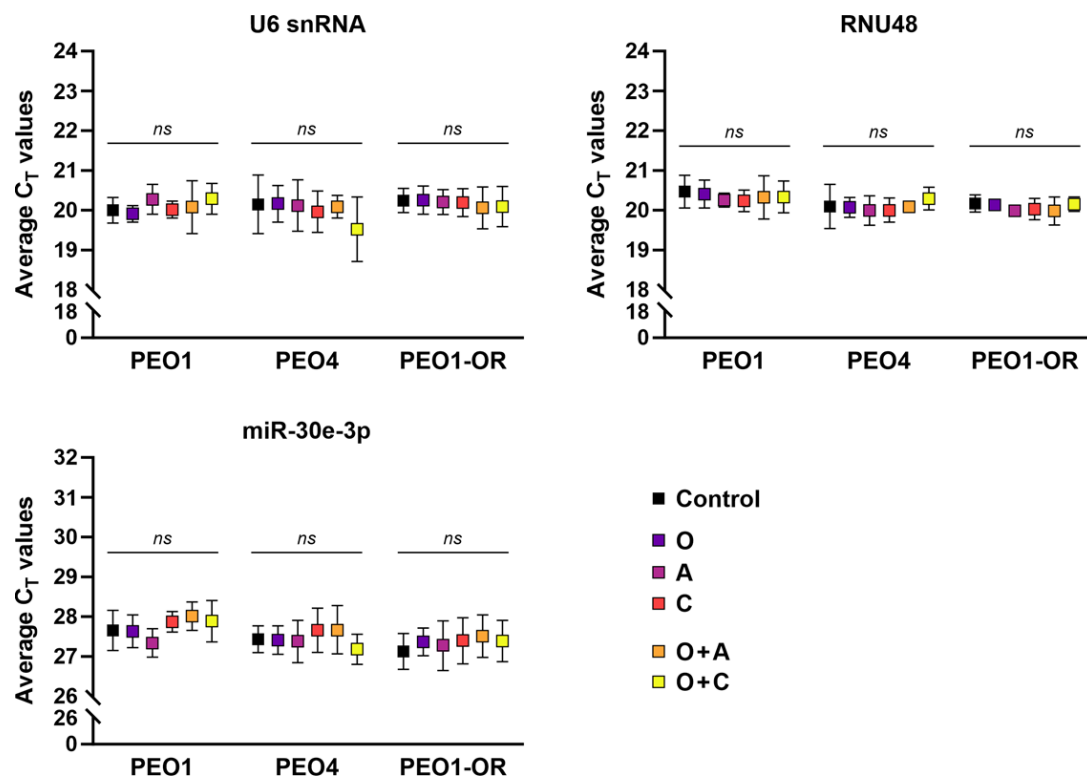

**Figure S3. Validation of endogenous control genes stable expression in HGSOC cell lines for RT-qPCR data normalization from Custom TaqMan™ MicroRNA Cards.** Symbols on graphs represent average  $C_T$  values ( $\pm$  SD) from four independent biological replicates ( $n = 4$ ). Significant differences in average  $C_T$  values between treatments for each gene and cell line were evaluated with ordinary one-way ANOVA followed by Tukey's post-hoc test. The abbreviation "ns" indicates a nonsignificant difference. O – olaparib, A – ATRi, C – CHK1i.

## Supplementary Figure 4 (Figure S4)

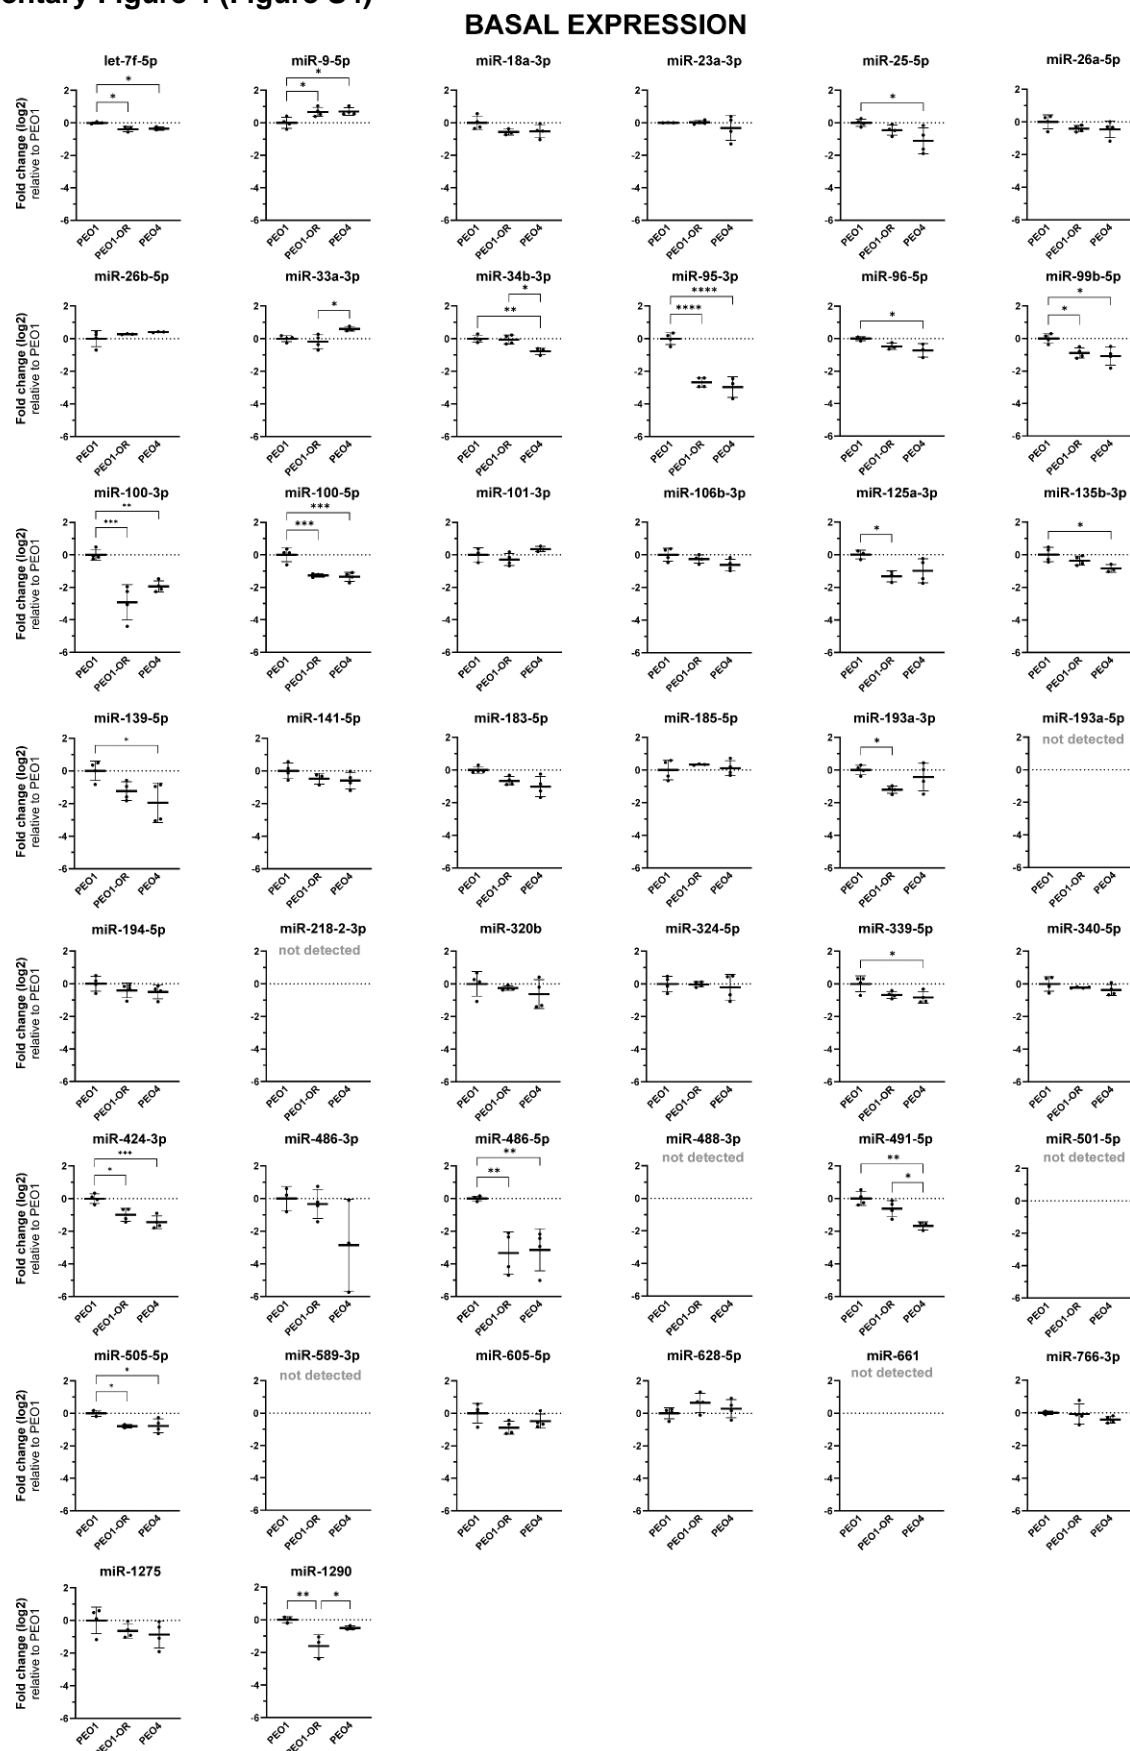

**Figure S4. Results of RT-qPCR-based differential miRNA basal expression analysis in untreated PEO1, PEO1-OR, and PEO4 cell lines after 2 days of cell culture (Custom TaqMan™ MicroRNA Cards).** Relative levels of miRNAs were expressed as means of logarithmic fold change  $\pm$  SD ( $n = 3 - 4$ ). Statistical significance was assessed compared to PEO1 cells with one-way ANOVA followed by multiple comparison tests: \* $p < 0.05$ , \*\* $p < 0.01$ , \*\*\* $p < 0.001$ , \*\*\*\* $p < 0.0001$ .



## Supplementary Figure 5 (Figure S5)

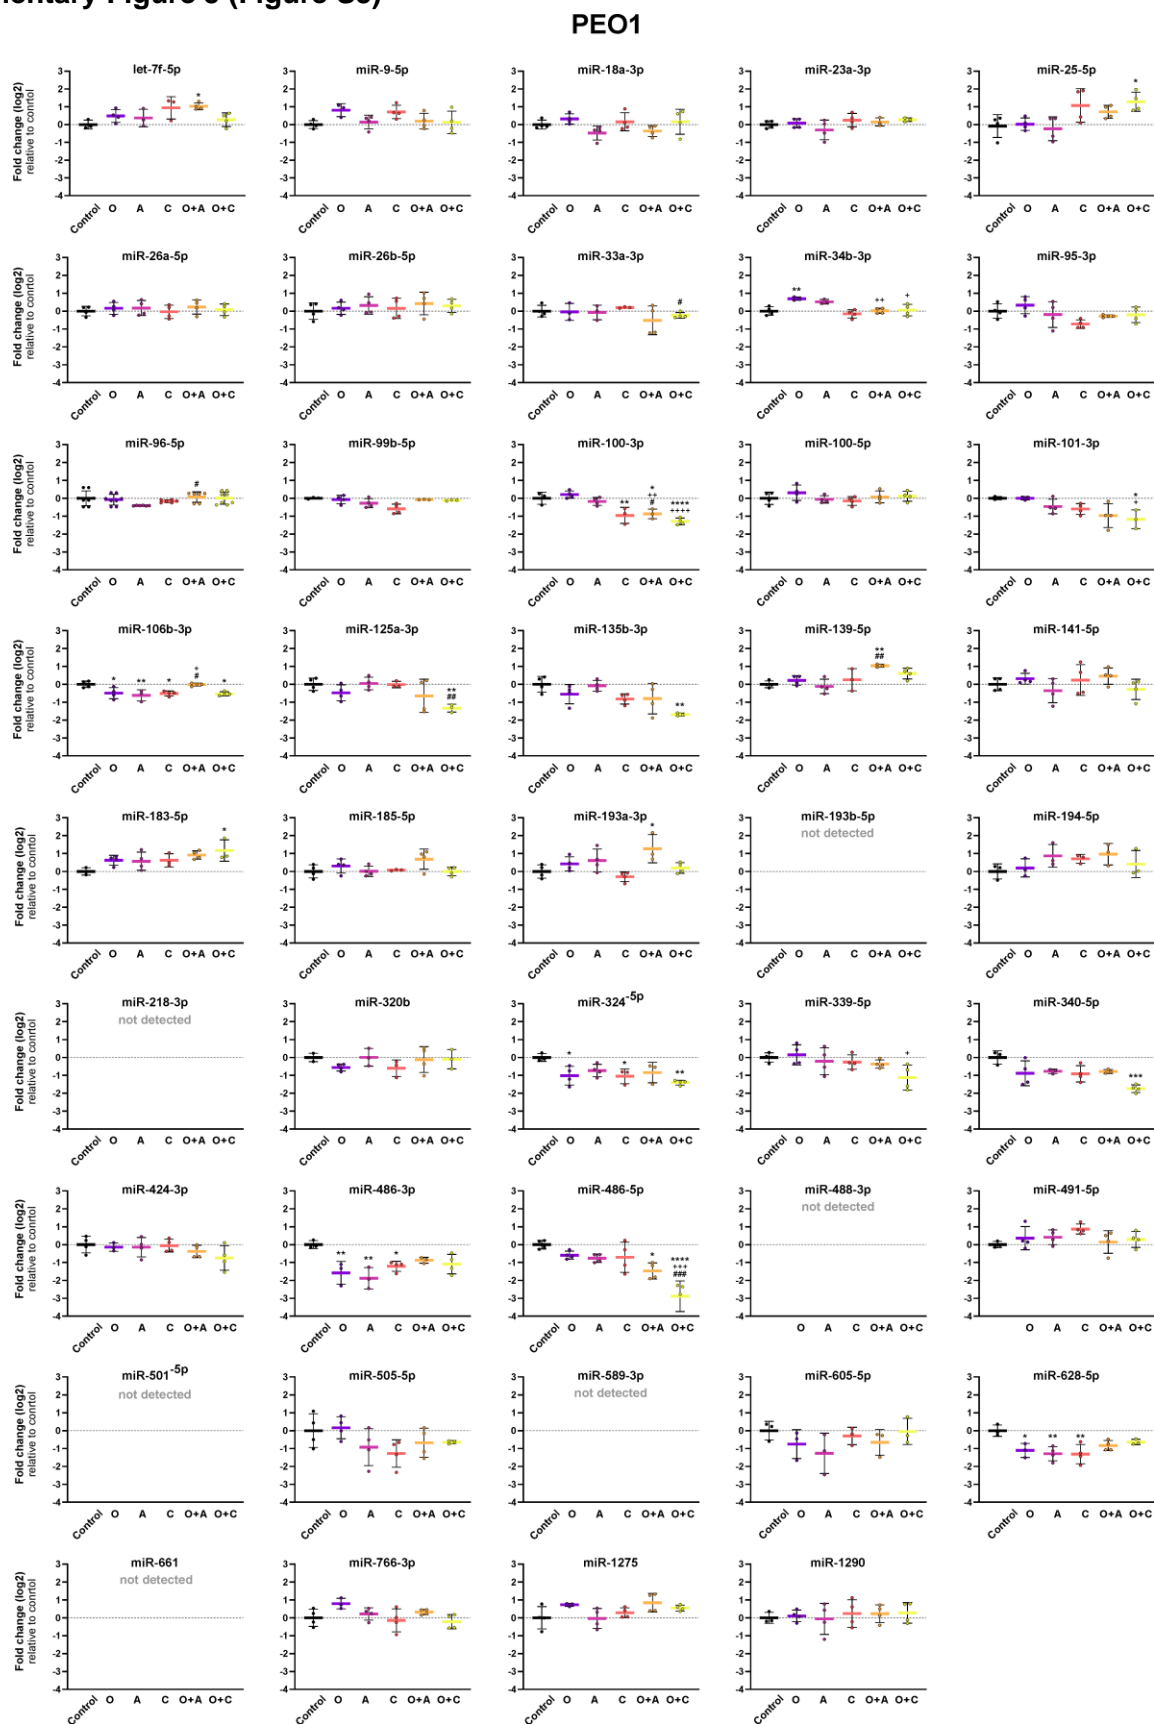

**Figure S5. Results of RT-qPCR-based differential miRNA expression analysis in PEO1 cell line incubated with olaparib (O), ATRi (A), CHK1i (C), or their combinations for 2 days (Custom TaqMan™ MicroRNA Cards).** Relative levels of miRNAs were expressed as means of logarithmic fold change  $\pm$  SD ( $n = 3 - 4$ ). Statistical significance was assessed with one-way ANOVA followed by multiple comparison tests: \* $p < 0.05$ , \*\* $p < 0.01$ , \*\*\* $p < 0.001$ , \*\*\*\* $p < 0.0001$  (treatment vs. control); + $p < 0.05$ , ++ $p < 0.01$ , +++ $p < 0.001$ , ++++ $p < 0.0001$  (O vs. combination with A or C); # $p < 0.05$ , ## $p < 0.01$ , ### $p < 0.001$ , #### $p < 0.0001$  (A or C vs. respective combinations with O).

## Supplementary Figure 6 (Figure S6)

### PEO1-OR

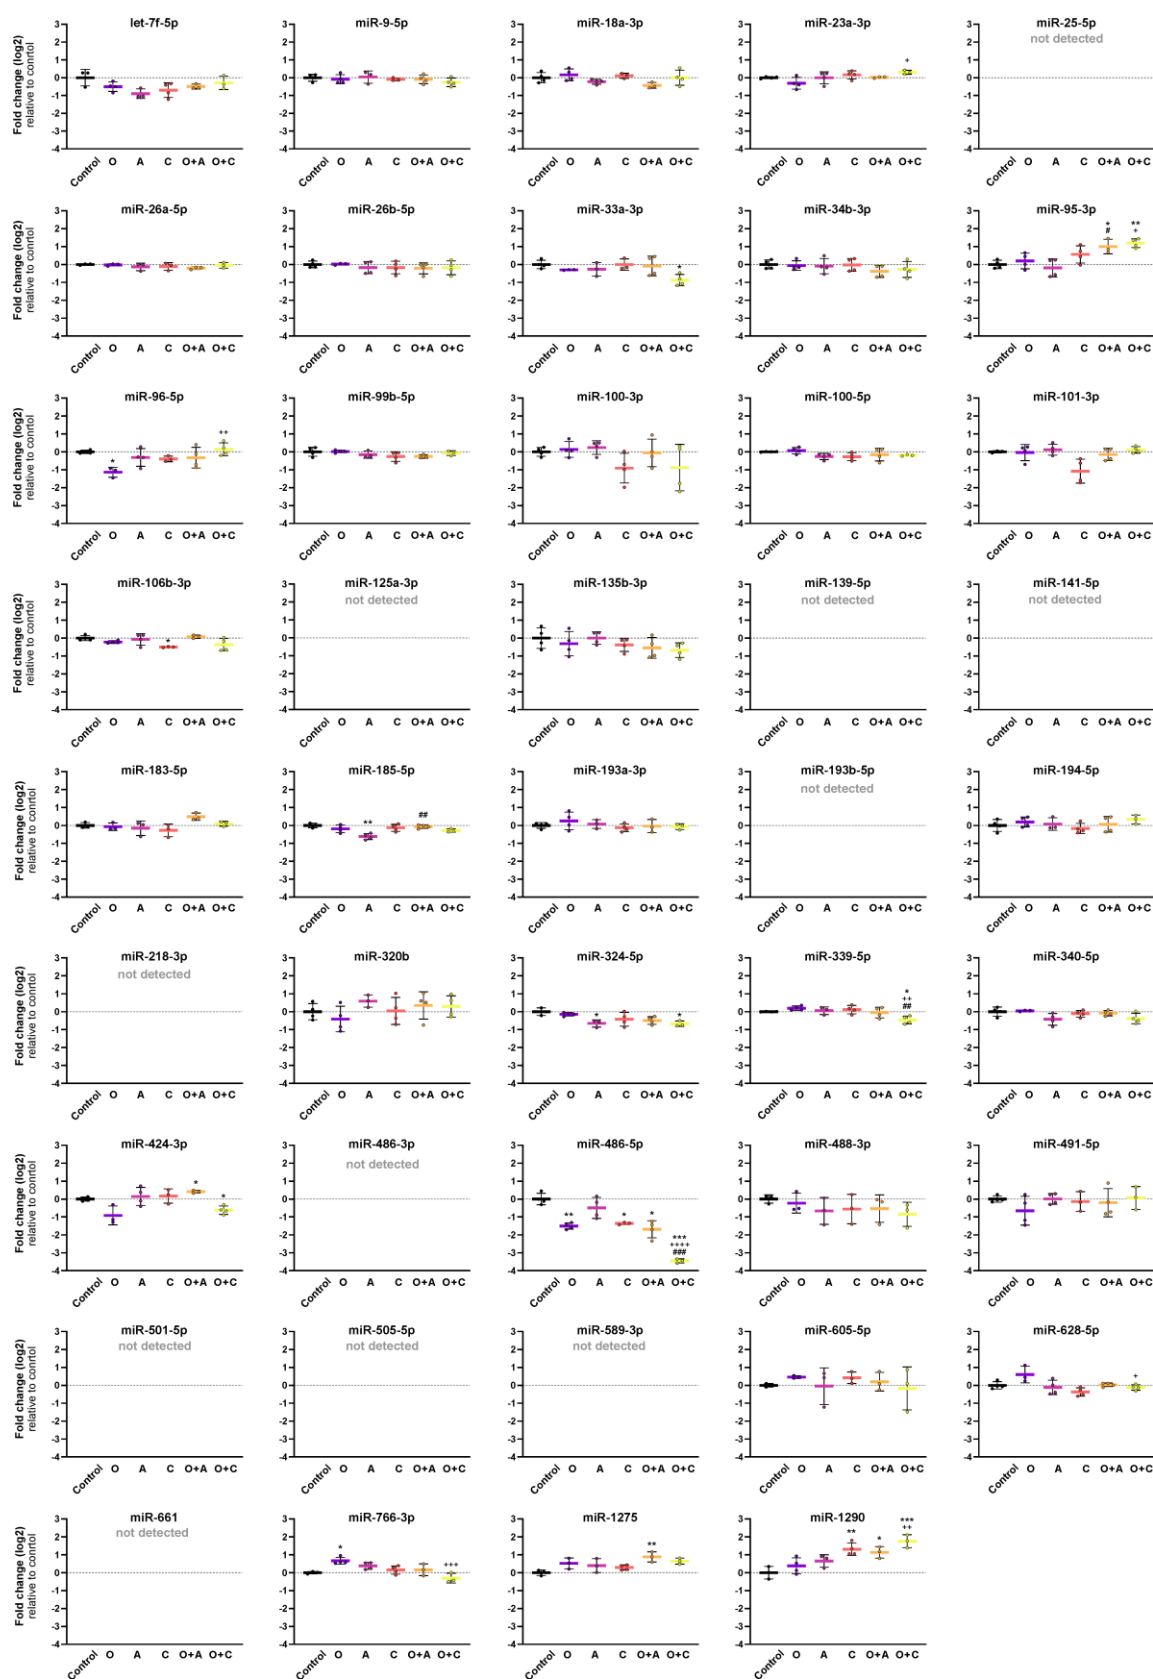

**Figure S6. Results of RT-qPCR-based differential miRNA expression analysis in PEO1-OR cell line incubated with olaparib (O), ATRi (A), CHK1i (C), or their combinations for 2 days (Custom TaqMan™ MicroRNA Cards).** Relative levels of miRNAs were expressed as means of logarithmic fold change ± SD (n = 3 – 4). Statistical significance was assessed with one-way ANOVA followed by multiple comparison tests: \* $p < 0.05$ , \*\* $p < 0.01$ , \*\*\* $p < 0.001$ , \*\*\*\* $p < 0.0001$  (treatment vs. control); \* $p < 0.05$ , \*\* $p < 0.01$ , \*\*\* $p < 0.001$ , \*\*\*\* $p < 0.0001$  (O vs. combination with A or C); # $p < 0.05$ , ## $p < 0.01$ , ### $p < 0.001$ , #### $p < 0.0001$  (A or C vs. respective combinations with O).

## Supplementary Figure 7 (Figure S7)

### PEO4

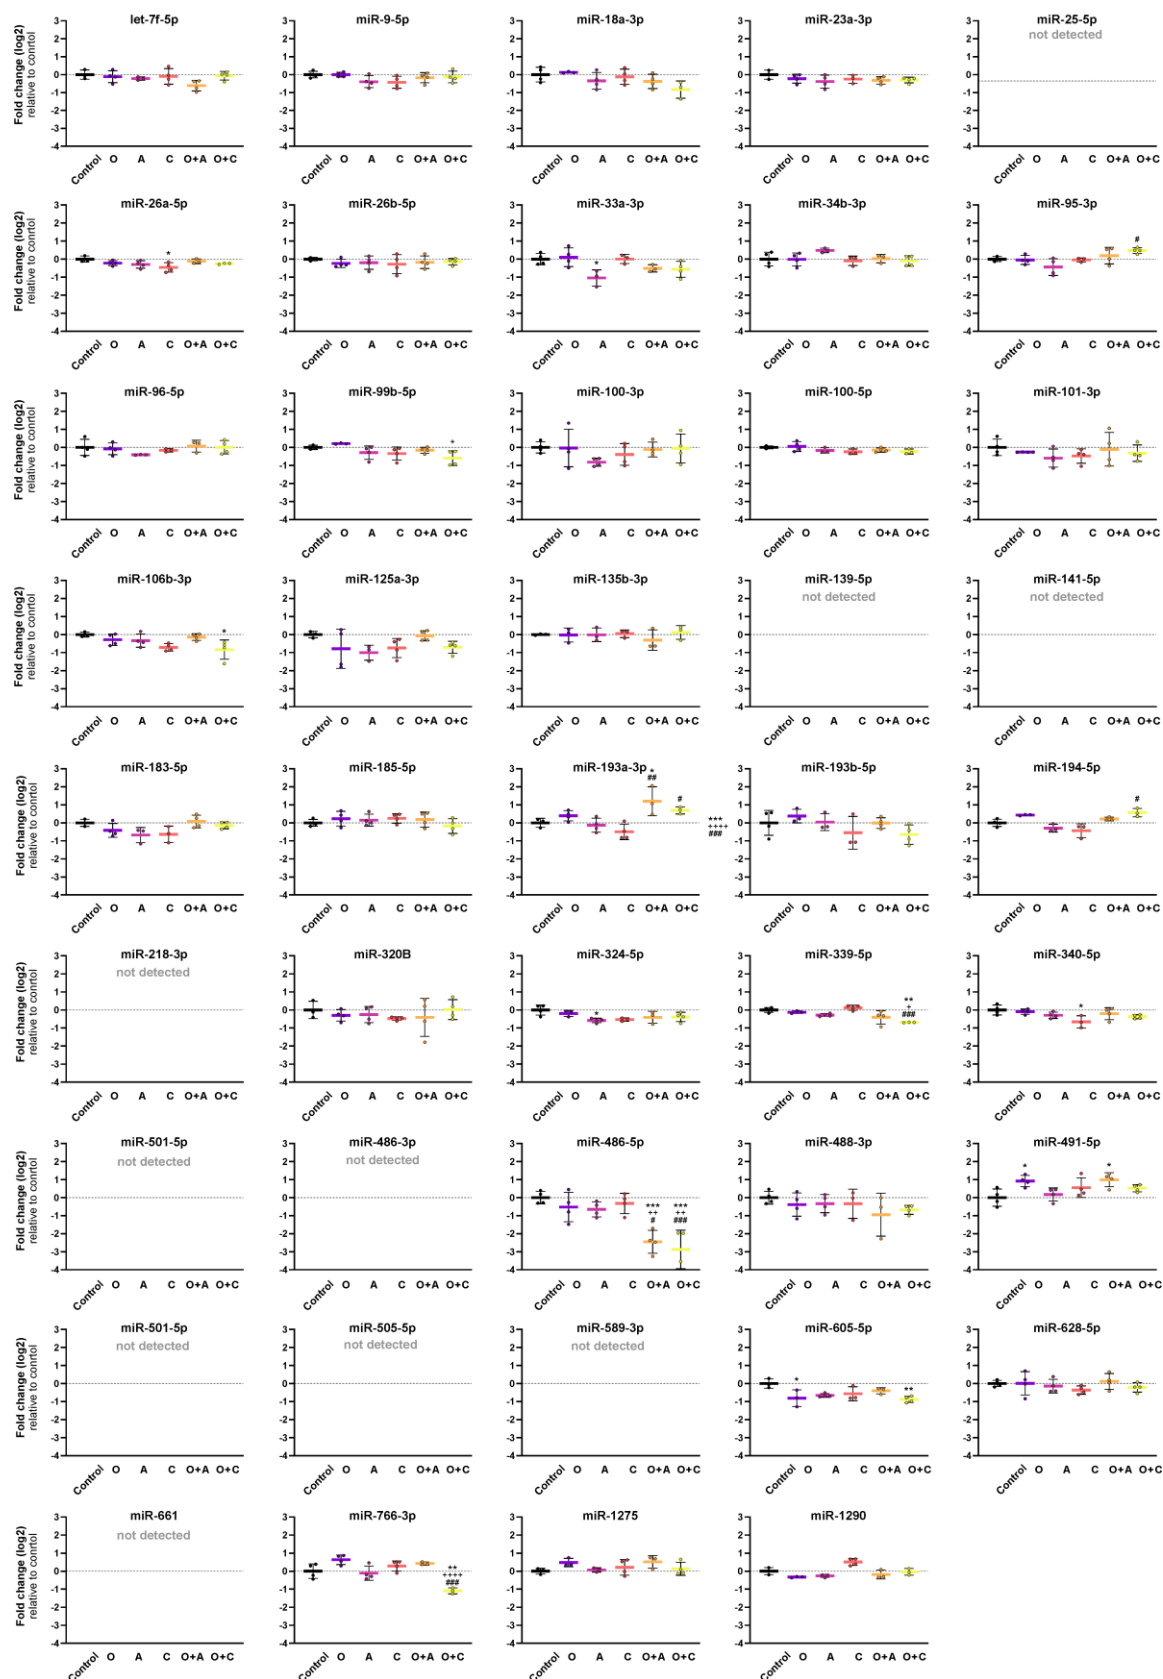

**Figure S7. Results of RT-qPCR-based differential miRNA expression analysis in PEO4 cell line incubated with olaparib (O), ATRi (A), CHK1i (C), or their combinations for 2 days (Custom TaqMan™ MicroRNA Cards).** Relative levels of miRNAs were expressed as means of logarithmic fold change  $\pm$  SD ( $n = 3 - 4$ ). Statistical significance was assessed with one-way ANOVA followed by multiple comparison tests: \* $p < 0.05$ , \*\* $p < 0.01$ , \*\*\* $p < 0.001$ , \*\*\*\* $p < 0.0001$  (treatment vs. control); + $p < 0.05$ , ++ $p < 0.01$ , +++ $p < 0.001$ , ++++ $p < 0.0001$  (O vs. combination with A or C); # $p < 0.05$ , ## $p < 0.01$ , ### $p < 0.001$ , #### $p < 0.0001$  (A or C vs. respective combinations with O).

Supplementary Figure 8 (Figure S8)

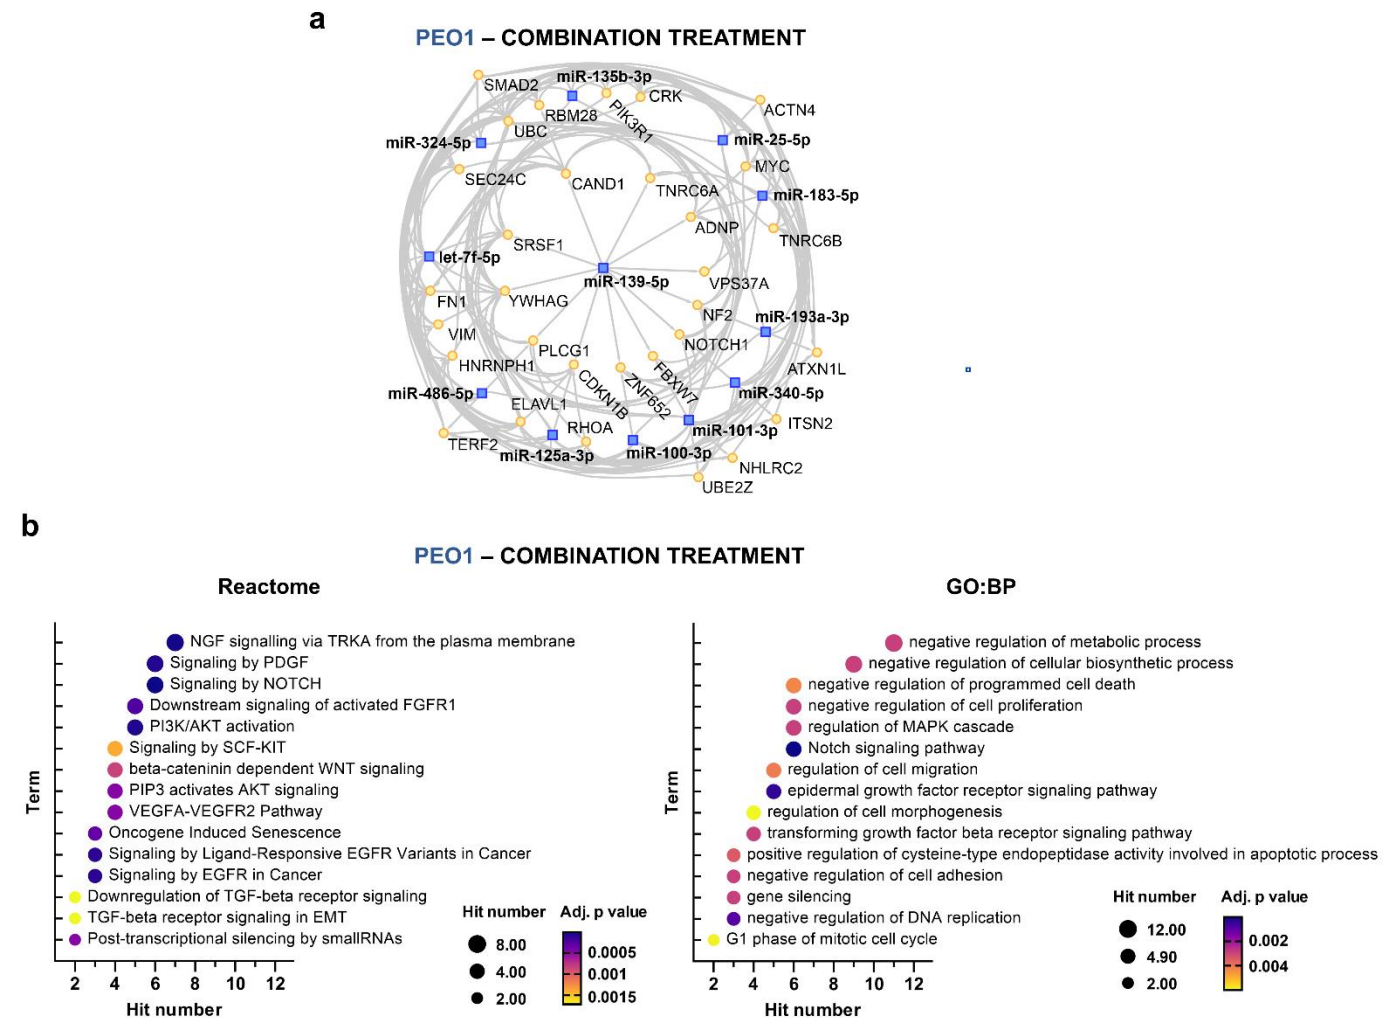

**Figure S8. Network-based functional enrichment analyses of significantly differentially expressed miRNAs and their target genes in PEO1 cell line incubated with olaparib combinations for 2 days. (a)** The minimal miRNA-mRNA interaction network. The blue square nodes represent miRNAs, and the yellow circular nodes represent target genes. **(b)** Enrichment terms visualized with bubble plots based on over-representation analysis for differentially expressed miRNA target genes in PEO1 cells. The most significantly enriched functional annotations were selected following analysis with Reactome pathways and Gene Ontology biological process (GO:BP) databases. Terms were ranked by adjusted  $p$  value and number of target genes (hit).

# Supplementary Figure 9 (Figure S9)

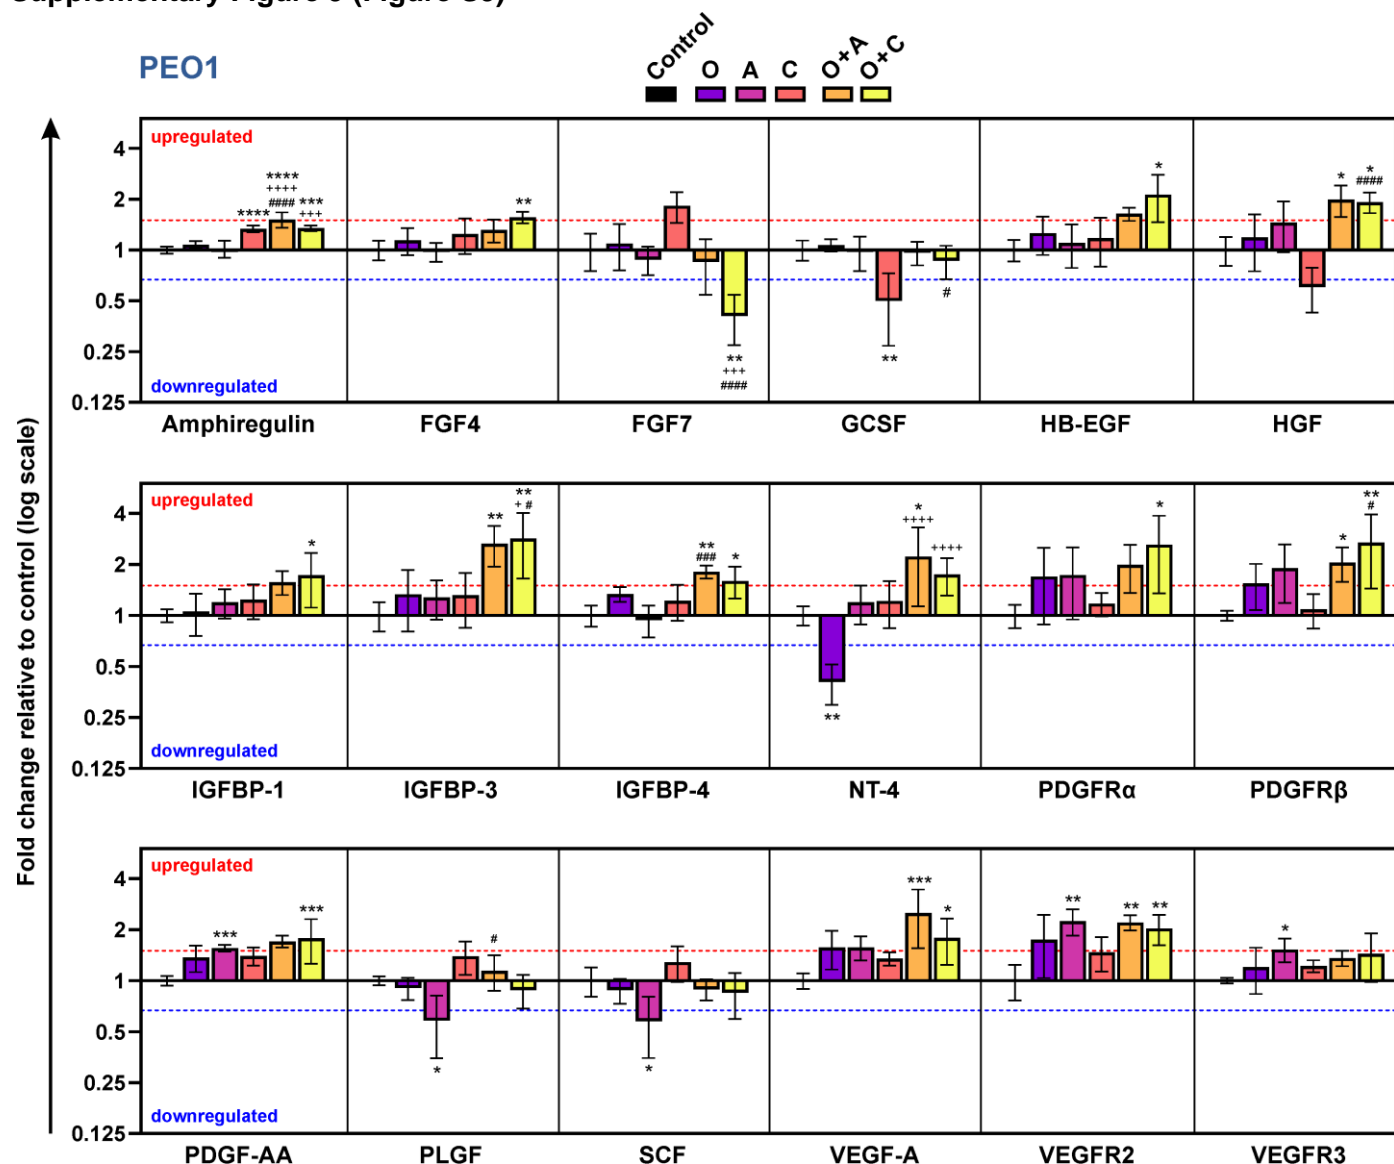

**Figure S9. Results of semi-quantitative analysis with antibody microarrays for growth factors with significantly dysregulated expression in PEO1 cells (absolute fold change  $\geq 1.5$ ,  $p < 0.05$ ).** Cells were incubated with inhibitors (O, A, C) or their combinations (O + A, O + C) for 2 days. Data was expressed as mean fold change  $\pm$  SD ( $n = 4$ ) on a logarithmized scale relative to untreated control cells. Statistical significance was assessed using one-way ANOVA followed by multiple comparison tests: \* $p < 0.05$ , \*\* $p < 0.01$ , \*\*\* $p < 0.001$ , \*\*\*\* $p < 0.0001$  (treatment vs. control); + $p < 0.05$ , ++ $p < 0.01$  (O vs. combination with A or C); # $p < 0.05$ , ## $p < 0.01$ , ### $p < 0.001$ , #### $p < 0.0001$  (A or C vs. respective combinations with O). O – olaparib, A – ATRi, C – CHK1i.

## Supplementary Figure 10 (Figure S10)

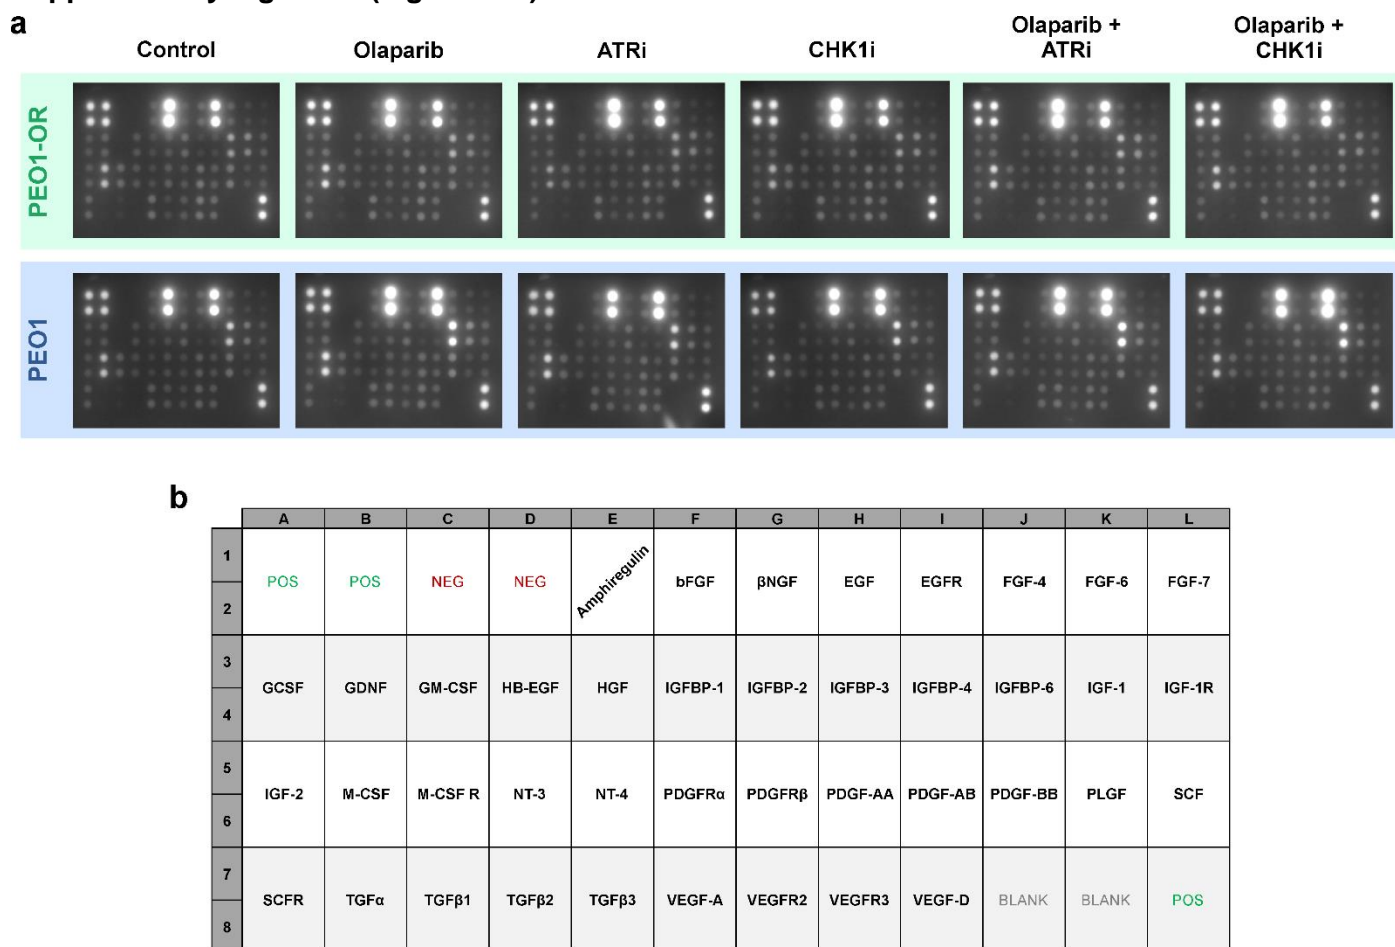

**Figure S10. Raw results of semi-quantitative analysis of 41 growth factors expression in PEO1 and PEO1-OR cells incubated with tested inhibitors or their combinations for 2 days. (a)** Representative enhanced chemiluminescence images of growth factor antibody arrays for PEO1 and PEO1-OR cell lines. **(b)** Array map with the locations of individual antigen-specific antibodies spotted in duplicate vertically. POS – positive control spots used for data normalization between arrays, NEG – negative control spots used to measure the baseline signal.



## Supplementary Figure 11 (Figure S11)

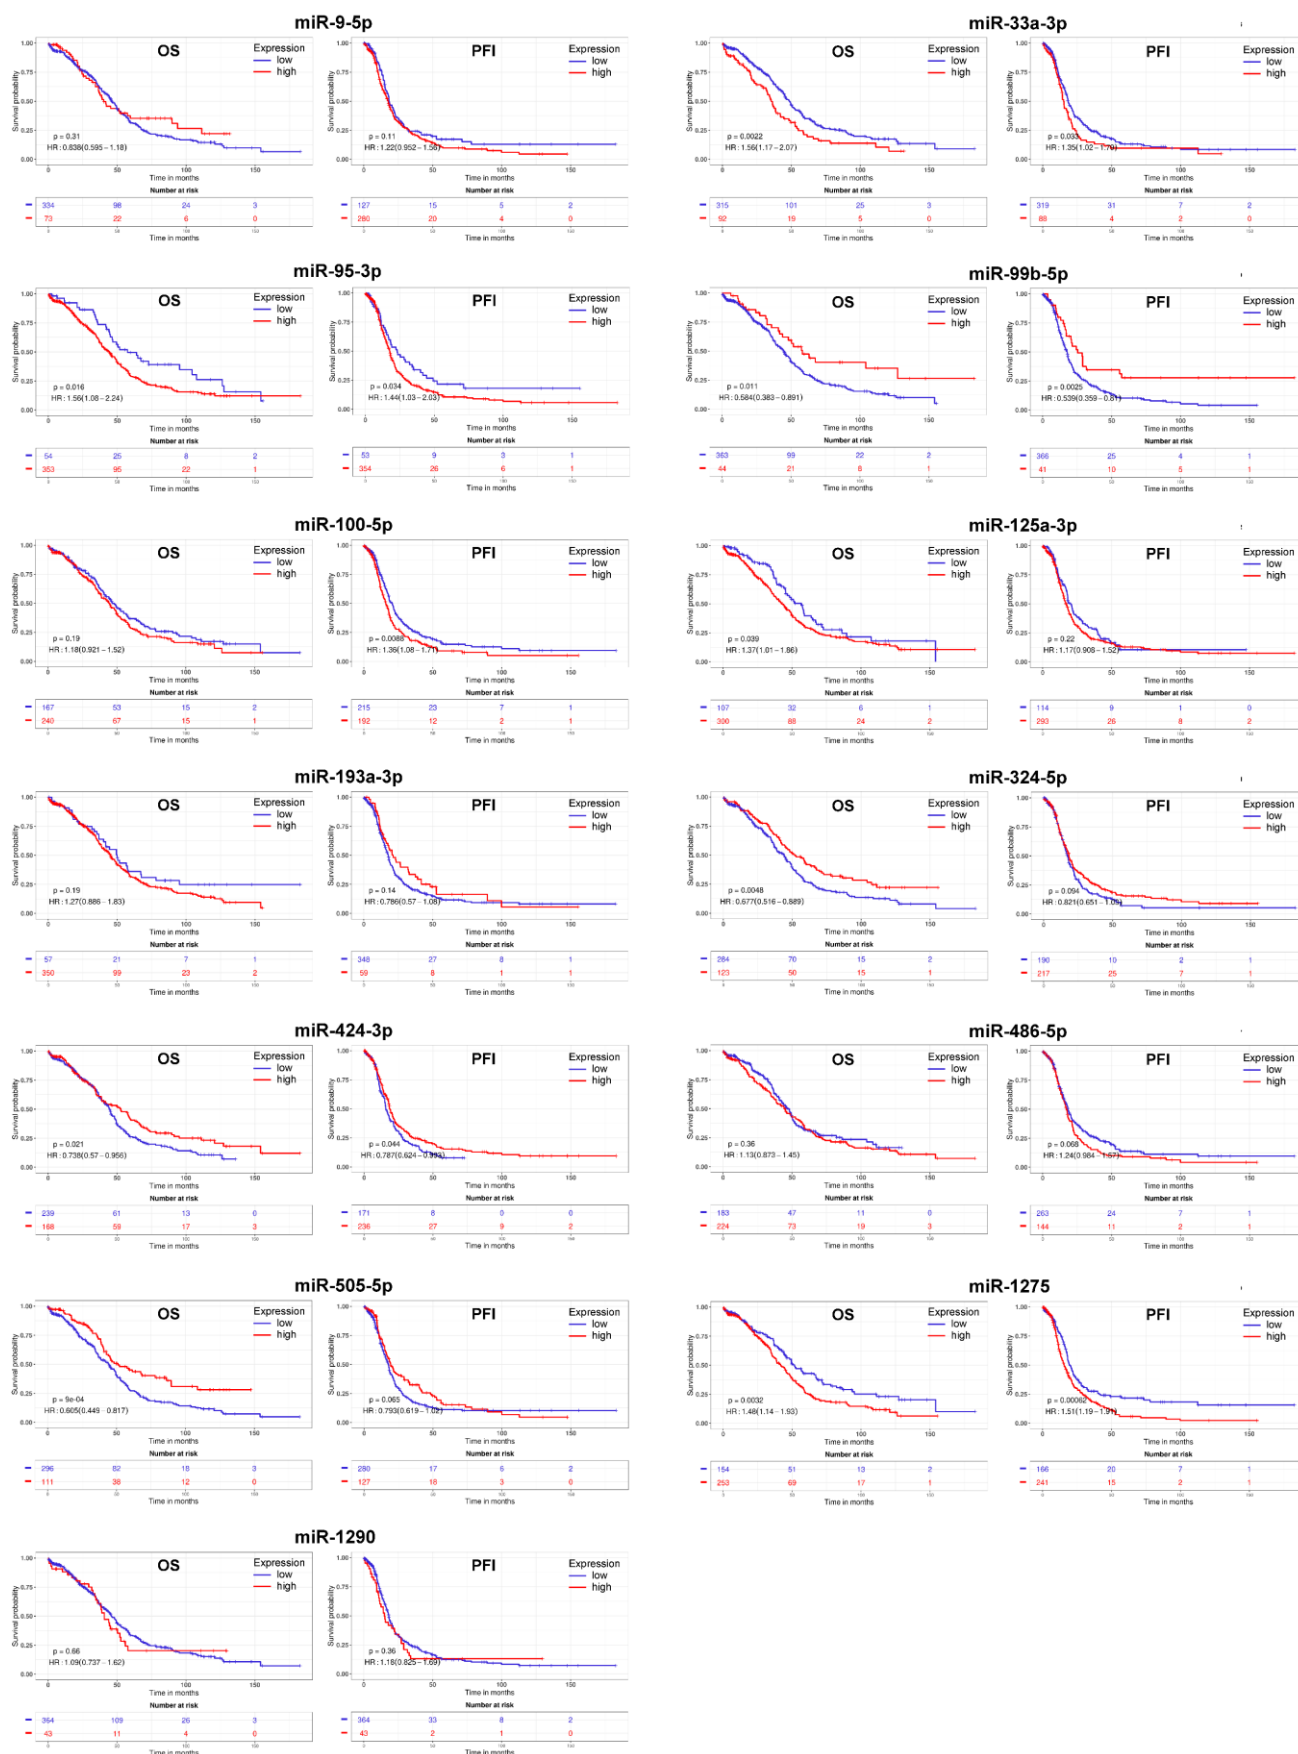

**Figure S11. Kaplan-Meier plots showing the relationship between miRNAs and clinical endpoints (OS – overall survival, PFI – progression-free intervals) in serous OC patients.** Prognostic univariate analyses were performed with the ToPP web-based tool with integrated data from TCGA-OV for HGSOc patients. Low and high expression OC cohorts were defined using the best cutoff and log-rank test. HR – hazard ratio (high vs low expression cohort).

## Supplementary Figure 12 (Figure S12)

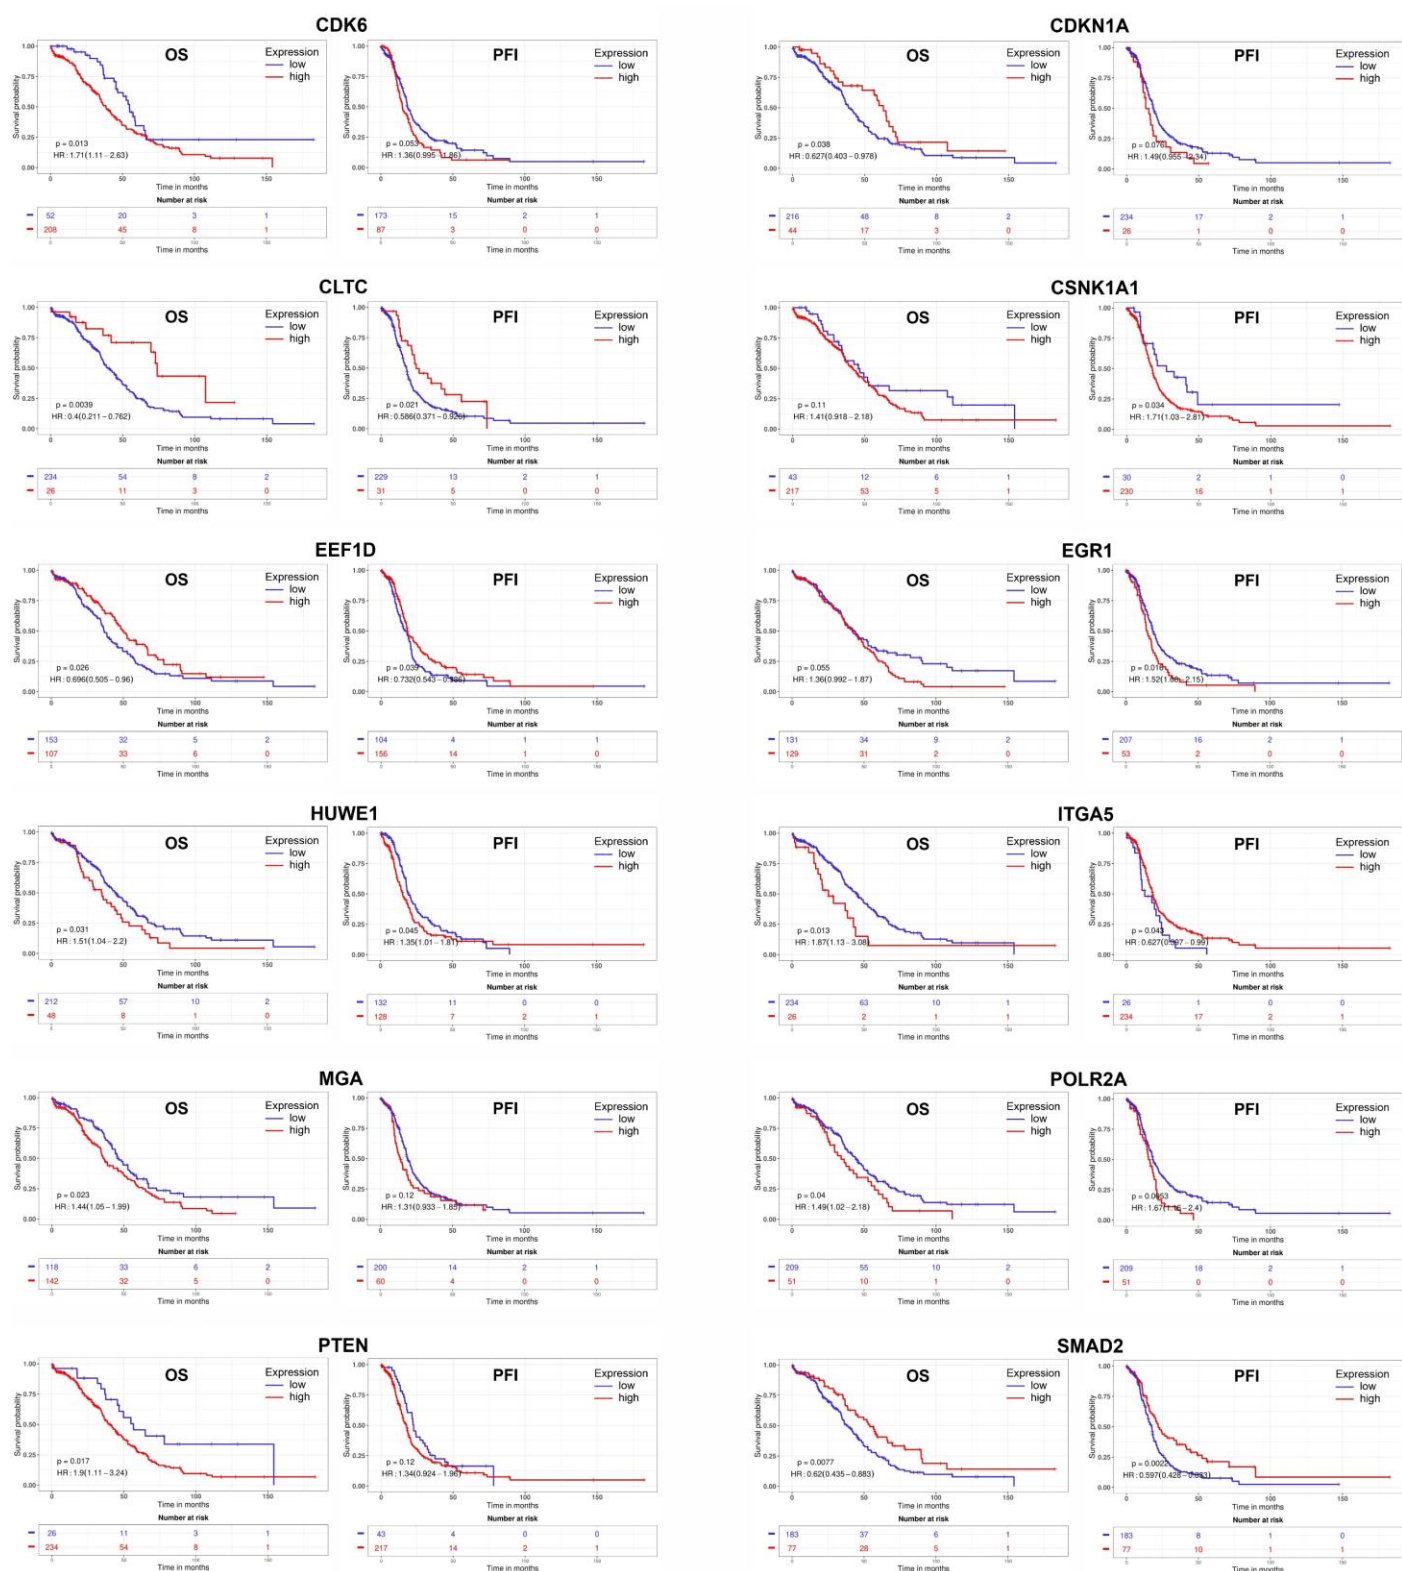

**Figure S12. Kaplan-Meier plots showing the relationship between target genes and clinical endpoints (OS – overall survival, PFI – progression-free intervals) in serous OC patients.** Prognostic univariate analyses were performed with the ToPP web-based tool with integrated data from TCGA-OV for HGSOC patients. Low and high expression OC cohorts were defined using the best cutoff and log-rank test. HR – hazard ratio (high vs low expression cohort).



## Supplementary Figure 13 (Figure S13)

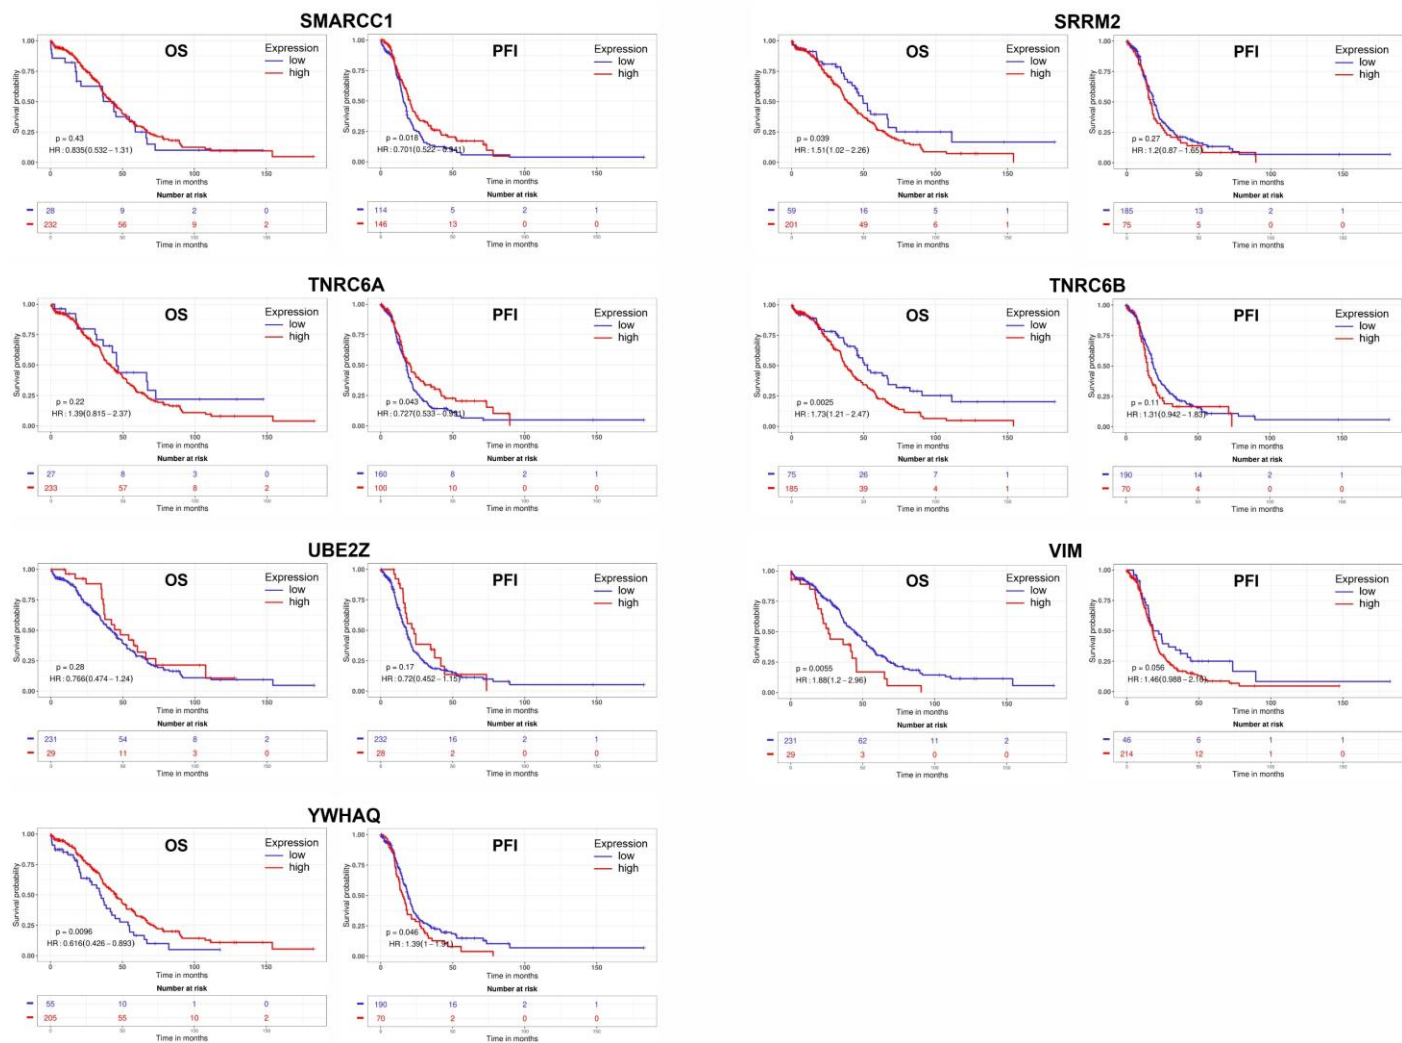

Figure S13. Kaplan-Meier plots showing the relationship between target genes and clinical endpoints (OS – overall survival, PFI – progression-free intervals) in serous OC patients (continued).

## SUPPLEMENTARY TABLES

### Supplementary Table 1 (Table S1)

List of key reagents used in the study.

| Reagent                                                                               | Catalog Number | Manufacturer                                   |
|---------------------------------------------------------------------------------------|----------------|------------------------------------------------|
| Megaplex™ RT Primers, Human Pool Set v3.0                                             | 4444745        | Applied Biosystems™ (Thermo Fisher Scientific) |
| Custom TaqMan™ Array MicroRNA Card                                                    | 4449139        | Applied Biosystems™ (Thermo Fisher Scientific) |
| <i>mirVana</i> ™ miRNA Isolation Kit, with phenol                                     | AM1560         | Applied Biosystems™ (Thermo Fisher Scientific) |
| TaqMan™ MicroRNA Reverse Transcription Kit                                            | 4366596        | Applied Biosystems™ (Thermo Fisher Scientific) |
| TaqMan™ Universal Master Mix II, no UNG                                               | 4440049        | Applied Biosystems™ (Thermo Fisher Scientific) |
| Water, Nuclease-free, Molecular Biology Grade, Ultrapure, Thermo Scientific Chemicals | J71786.XCR     | Applied Biosystems™ (Thermo Fisher Scientific) |
| TaqMan™ Array Human MicroRNA A+B Cards Set v3.0                                       | 4444913        | Applied Biosystems™ (Thermo Fisher Scientific) |
| High-Capacity cDNA Reverse Transcription Kit                                          | 4368814        | Applied Biosystems™ (Thermo Fisher Scientific) |
| RNase Inhibitor                                                                       | N8080119       | Applied Biosystems™ (Thermo Fisher Scientific) |
| Ceralasertib (ATRI)                                                                   | TBW02661       | Wuhan ChemNorm Biotech                         |
| MK-8776 (CHK1i)                                                                       | TBW02666       | Wuhan ChemNorm Biotech                         |
| Olaparib                                                                              | S1060          | Selleck Chemicals                              |
| RayBio® C-Series Human Growth Factor Antibody Array 1                                 | AAH-GF-1-8     | RayBiotech Life                                |

## Supplementary Table 2 (Table S2)

Selection of 44 out of 69 dysregulated miRNAs for validation on Custom TaqMan™ MicroRNA Cards based on bioinformatic analyses and literature review.

| #  | miRNA        | miRBase accession | Strong experimental evidence of miRNA-mRNA interactions * | Interaction with the network ** | Node degree in the network $\geq 3$ | Selected for validation |
|----|--------------|-------------------|-----------------------------------------------------------|---------------------------------|-------------------------------------|-------------------------|
| 1  | let-7f-5p    | +                 | +                                                         | +                               | +                                   | YES                     |
| 2  | let-7i-3p    | +                 | NO                                                        | n/a                             | n/a                                 | NO                      |
| 3  | miR-7-5p     | +                 | +                                                         | +                               | +                                   | NO                      |
| 4  | miR-9-5p     | +                 | +                                                         | +                               | +                                   | YES                     |
| 5  | miR-18a-3p   | +                 | +                                                         | +                               | +                                   | YES                     |
| 6  | miR-23a-3p   | +                 | +                                                         | +                               | +                                   | YES                     |
| 7  | miR-25-5p    | +                 | +                                                         | +                               | NO                                  | YES***                  |
| 8  | miR-26a-5p   | +                 | +                                                         | +                               | +                                   | YES                     |
| 9  | miR-26b-5p   | +                 | +                                                         | +                               | +                                   | YES                     |
| 10 | miR-27b-5p   | +                 | +                                                         | NO                              | NO                                  | NO                      |
| 11 | miR-32-5p    | +                 | +                                                         | +                               | +                                   | NO                      |
| 12 | miR-33a-3p   | +                 | +                                                         | +                               | +                                   | YES                     |
| 13 | miR-34b-3p   | +                 | +                                                         | +                               | +                                   | YES                     |
| 14 | miR-92a-1-5p | +                 | +                                                         | NO                              | NO                                  | NO                      |
| 15 | miR-95-3p    | +                 | +                                                         | +                               | +                                   | YES                     |
| 16 | miR-96-5p    | +                 | +                                                         | +                               | +                                   | YES                     |
| 17 | miR-99b-5p   | +                 | +                                                         | +                               | +                                   | YES                     |
| 18 | miR-100-3p   | +                 | +                                                         | +                               | NO                                  | YES***                  |
| 19 | miR-100-5p   | +                 | +                                                         | +                               | +                                   | YES                     |
| 20 | miR-101-3p   | +                 | +                                                         | +                               | +                                   | YES                     |
| 21 | miR-106b-3p  | +                 | +                                                         | +                               | NO                                  | YES***                  |
| 22 | miR-125a-3p  | +                 | +                                                         | +                               | +                                   | YES                     |
| 23 | miR-129-2-3p | +                 | +                                                         | +                               | +                                   | NO                      |
| 24 | miR-130b-5p  | +                 | NO                                                        | n/a                             | n/a                                 | NO                      |
| 25 | miR-135b-3p  | +                 | +                                                         | +                               | +                                   | NO                      |
| 26 | miR-139-5p   | +                 | +                                                         | +                               | +                                   | YES                     |
| 27 | miR-141-5p   | +                 | +                                                         | +                               | +                                   | YES                     |
| 28 | miR-183-5p   | +                 | +                                                         | +                               | +                                   | YES                     |
| 29 | miR-185-5p   | +                 | +                                                         | +                               | +                                   | YES                     |
| 30 | miR-192-5p   | +                 | +                                                         | +                               | +                                   | NO                      |
| 31 | miR-193a-3p  | +                 | +                                                         | +                               | +                                   | NO                      |
| 32 | miR-193a-5p  | +                 | +                                                         | +                               | +                                   | YES                     |
| 33 | miR-193b-5p  | +                 | +                                                         | +                               | NO                                  | NO                      |
| 34 | miR-194-5p   | +                 | +                                                         | +                               | +                                   | YES                     |
| 35 | miR-210-3p   | +                 | +                                                         | +                               | +                                   | NO                      |
| 36 | miR-218-2-3p | +                 | +                                                         | NO                              | NO                                  | YES***                  |
| 37 | miR-320b     | +                 | +                                                         | +                               | NO                                  | YES***                  |
| 38 | miR-324-5p   | +                 | +                                                         | +                               | +                                   | YES                     |
| 39 | miR-328-3p   | +                 | +                                                         | +                               | +                                   | NO                      |
| 40 | miR-331-5p   | +                 | NO                                                        | n/a                             | n/a                                 | NO                      |
| 41 | miR-339-5p   | +                 | +                                                         | +                               | +                                   | YES                     |
| 42 | miR-340-5p   | +                 | +                                                         | +                               | +                                   | YES                     |
| 43 | miR-362-5p   | +                 | +                                                         | NO                              | NO                                  | NO                      |
| 44 | miR-378a-5p  | +                 | +                                                         | NO                              | NO                                  | NO                      |
| 45 | miR-424-3p   | +                 | +                                                         | NO                              | NO                                  | NO                      |
| 46 | miR-454-5p   | +                 | NO                                                        | n/a                             | n/a                                 | NO                      |
| 47 | miR-486-3p   | +                 | +                                                         | +                               | +                                   | YES                     |
| 48 | miR-486-5p   | +                 | +                                                         | +                               | +                                   | YES                     |
| 49 | miR-488-3p   | +                 | +                                                         | +                               | +                                   | YES                     |
| 50 | miR-491-5p   | +                 | +                                                         | +                               | +                                   | YES                     |
| 51 | miR-494-3p   | +                 | +                                                         | +                               | +                                   | NO                      |
| 52 | miR-501-5p   | +                 | +                                                         | +                               | +                                   | YES                     |
| 53 | miR-505-5p   | +                 | NO                                                        | n/a                             | n/a                                 | YES***                  |
| 54 | miR-550a-3p  | +                 | +                                                         | NO                              | NO                                  | NO                      |
| 55 | miR-571      | +                 | NO                                                        | n/a                             | n/a                                 | NO                      |
| 56 | miR-573      | +                 | +                                                         | NO                              | NO                                  | NO                      |
| 57 | miR-577      | +                 | NO                                                        | n/a                             | n/a                                 | NO                      |
| 58 | miR-589-3p   | +                 | NO                                                        | n/a                             | n/a                                 | YES***                  |
| 59 | miR-596      | +                 | +                                                         | NO                              | NO                                  | NO                      |
| 60 | miR-598-3p   | +                 | NO                                                        | n/a                             | n/a                                 | NO                      |
| 61 | miR-605-5p   | +                 | +                                                         | +                               | +                                   | YES                     |
| 62 | miR-628-5p   | +                 | +                                                         | +                               | NO                                  | YES                     |
| 63 | miR-629-3p   | +                 | NO                                                        | n/a                             | n/a                                 | NO                      |

| #                              | miRNA      | miRBase accession | Strong experimental evidence of miRNA-mRNA interactions * | Interaction with the network ** | Node degree in the network $\geq 3$ | Selected for validation |
|--------------------------------|------------|-------------------|-----------------------------------------------------------|---------------------------------|-------------------------------------|-------------------------|
| 64                             | miR-661    | +                 | +                                                         | +                               | +                                   | YES                     |
| 65                             | miR-766-3p | +                 | +                                                         | +                               | NO                                  | YES                     |
| 66                             | miR-941    | +                 | +                                                         | NO                              | NO                                  | NO                      |
| 67                             | miR-1201   | NO                | n/a                                                       | n/a                             | n/a                                 | NO                      |
| 68                             | miR-1275   | +                 | NO                                                        | n/a                             | n/a                                 | YES***                  |
| 69                             | miR-1290   | +                 | +                                                         | +                               | NO                                  | YES                     |
| <b>Total number of miRNAs:</b> |            | <b>69</b>         | <b>68</b>                                                 | <b>57</b>                       | <b>47</b>                           | <b>39</b>               |
|                                |            |                   |                                                           |                                 | <b>39</b>                           | <b>44</b>               |

\* Experimentally validated miRNA-target interactions from the MIENTURNET web tool (using miRTarBase website release 7.0 from September 2017).

\*\* Working network created with MIENTURNET web tool.

\*\*\* miRNAs selected based on literature review (irrespective of bioinformatic analysis).

### Supplementary Table 3 (Table S3)

List of analyzed miRNAs and small RNAs for miRNA validation with Custom TaqMan™ MicroRNA Cards.

| #  | Assay name   | Assay Type         | TaqMan™ MicroRNA Assay ID |
|----|--------------|--------------------|---------------------------|
| 1  | let-7f-5p    | target             | 000382                    |
| 2  | miR-9-5p     | target             | 000583                    |
| 3  | miR-18a-3p   | target             | 002423                    |
| 4  | miR-23a-3p   | target             | 000399                    |
| 5  | miR-25-5p    | target             | 002442                    |
| 6  | miR-26a-5p   | target             | 000405                    |
| 7  | miR-26b-5p   | target             | 000407                    |
| 8  | miR-33a-3p   | target             | 002136                    |
| 9  | miR-34b-3p   | target             | 002102                    |
| 10 | miR-95-3p    | target             | 000433                    |
| 11 | miR-96-5p    | target             | 000186                    |
| 12 | miR-99b-5p   | target             | 000436                    |
| 13 | miR-100-3p   | target             | 002142                    |
| 14 | miR-100-5p   | target             | 000437                    |
| 15 | miR-101-3p   | target             | 002253                    |
| 16 | miR-106b-3p  | target             | 002380                    |
| 17 | miR-125a-3p  | target             | 002199                    |
| 18 | miR-135b-3p  | target             | 002159                    |
| 19 | miR-139-5p   | target             | 002289                    |
| 20 | miR-141-5p   | target             | 002145                    |
| 21 | miR-183-5p   | target             | 002269                    |
| 22 | miR-185-5p   | target             | 002271                    |
| 23 | miR-193a-3p  | target             | 002250                    |
| 24 | miR-193a-5p  | target             | 002366                    |
| 25 | miR-194-5p   | target             | 000493                    |
| 26 | miR-218-2-3p | target             | 002294                    |
| 27 | miR-320b     | target             | 002844                    |
| 28 | miR-324-5p   | target             | 000539                    |
| 29 | miR-339-5p   | target             | 002257                    |
| 30 | miR-340-5p   | target             | 002258                    |
| 31 | miR-424-3p   | target             | 002309                    |
| 32 | miR-486-3p   | target             | 002093                    |
| 33 | miR-486-5p   | target             | 001278                    |
| 34 | miR-488-3p   | target             | 002357                    |
| 35 | miR-491-5p   | target             | 001630                    |
| 36 | miR-501-5p   | target             | 001047                    |
| 37 | miR-505-5p   | target             | 002087                    |
| 38 | miR-589-3p   | target             | 001543                    |
| 39 | miR-605-5p   | target             | 001568                    |
| 40 | miR-628-5p   | target             | 002433                    |
| 41 | miR-661      | target             | 001606                    |
| 42 | miR-766-3p   | target             | 001986                    |
| 43 | miR-1275     | target             | 002840                    |
| 44 | miR-1290     | target             | 002863                    |
| 45 | miR-30e-3p   | endogenous control | 000422                    |
| 46 | RNU48        | endogenous control | 001006                    |
| 47 | U6 snRNA     | endogenous control | 001973                    |
| 48 | U6 snRNA     | endogenous control | 001973                    |

## Supplementary Table 4 (Table S4)

**Average fold change values of significantly differentially expressed miRNAs in HGSOC cell lines with (Custom TaqMan™ MicroRNA Cards).** Basal expression in the absence of inhibitors was calculated in untreated PEO1-OR and PEO4 cells relative to untreated PEO1 cells. Expression in response to treatment was calculated in all HGSOC cell lines relative to respective untreated controls. Significantly down- and upregulated miRNAs (absolute fold change  $\geq 1.5$  and  $p < 0.05$ ) were highlighted with blue and red, respectively. n/d – not detected ( $C_T \geq 32$  in untreated control cells)

| miRNA       | BASAL LEVELS |       | RESPONSE TO TREATMENT |       |       |       |       |         |       |       |       |       |       |       |       |       |       |
|-------------|--------------|-------|-----------------------|-------|-------|-------|-------|---------|-------|-------|-------|-------|-------|-------|-------|-------|-------|
|             |              |       | PEO1                  |       |       |       |       | PEO1-OR |       |       |       |       | PEO4  |       |       |       |       |
|             | PEO1-OR      | PEO4  | O                     | A     | C     | O+A   | O+C   | O       | A     | C     | O+A   | O+C   | O     | A     | C     | O+A   | O+C   |
| let-7f-5p   | -1.31        | -1.28 | 1.40                  | 1.29  | 1.92  | 2.04  | 1.21  | -1.42   | -1.86 | -1.63 | -1.41 | -1.22 | -1.08 | -1.17 | -1.07 | -1.53 | -1.05 |
| miR-9-5p    | 1.59         | 1.62  | 1.75                  | 1.10  | 1.63  | 1.14  | 1.09  | -1.06   | 1.03  | -1.07 | -1.06 | -1.20 | -1.00 | -1.32 | -1.34 | -1.13 | -1.09 |
| miR-23a-3p  | 1.02         | -1.25 | 1.05                  | -1.23 | 1.19  | 1.11  | 1.21  | -1.24   | -1.00 | 1.11  | 1.01  | 1.24  | -1.17 | -1.31 | -1.19 | -1.25 | -1.24 |
| miR-25-5p   | -1.37        | -2.16 | 1.22                  | 1.01  | 2.36  | 2.08  | 2.91  | n/d     | n/d   | n/d   | n/d   | n/d   | n/d   | n/d   | n/d   | n/d   | n/d   |
| miR-33a-3p  | -1.14        | 1.52  | -1.03                 | -1.05 | 1.15  | -1.43 | -1.18 | -1.24   | -1.21 | -1.01 | -1.06 | -1.84 | 1.07  | -2.07 | 1.00  | -1.43 | -1.48 |
| miR-34b-3p  | -1.04        | -1.70 | 1.61                  | 1.44  | -1.11 | 1.01  | 1.04  | -1.04   | -1.07 | -1.02 | -1.31 | -1.21 | -1.01 | 1.39  | -1.07 | 1.02  | -1.07 |
| miR-95-3p   | -6.37        | -6.14 | 1.26                  | -1.14 | -1.65 | -1.21 | -1.16 | 1.14    | -1.14 | 1.47  | 1.99  | 2.28  | -1.04 | -1.36 | -1.03 | 1.14  | 1.39  |
| miR-96-5p   | -1.39        | -1.65 | -1.06                 | -1.33 | -1.12 | 1.05  | 1.00  | -2.20   | -1.24 | -1.31 | -1.25 | 1.10  | n/d   | n/d   | n/d   | n/d   | n/d   |
| miR-99b-5p  | -1.86        | -2.12 | -1.05                 | -1.22 | -1.51 | -1.06 | -1.09 | 1.01    | -1.11 | -1.20 | -1.19 | -1.05 | 1.16  | -1.22 | -1.27 | -1.11 | -1.51 |
| miR-100-3p  | -7.58        | -3.85 | 1.15                  | -1.13 | -1.95 | -1.83 | -2.44 | 1.10    | 1.18  | -1.88 | -1.04 | -1.84 | -1.02 | -1.77 | -1.31 | -1.09 | -1.04 |
| miR-100-5p  | -2.41        | -2.55 | 1.24                  | -1.04 | -1.11 | 1.06  | 1.08  | 1.05    | -1.20 | -1.21 | -1.11 | -1.14 | 1.03  | -1.13 | -1.18 | -1.11 | -1.18 |
| miR-101-3p  | -1.22        | 1.28  | 1.00                  | -1.38 | -1.52 | -1.97 | -2.26 | -1.03   | 1.09  | -2.11 | -1.11 | 1.08  | -1.20 | -1.51 | -1.39 | -1.08 | -1.25 |
| miR-106b-3p | -1.20        | -1.54 | -1.41                 | -1.54 | -1.43 | -1.01 | -1.45 | -1.17   | -1.05 | -1.42 | 1.05  | -1.29 | -1.22 | -1.26 | -1.64 | -1.10 | -1.79 |
| miR-125a-3p | -2.52        | -1.98 | -1.39                 | 1.03  | -1.01 | -1.56 | -2.53 | n/d     | n/d   | n/d   | n/d   | n/d   | -1.72 | -2.01 | -1.68 | -1.05 | -1.63 |
| miR-135b-3p | -1.29        | -1.80 | -1.47                 | -1.06 | -1.76 | -1.74 | -3.22 | -1.25   | -1.00 | -1.30 | -1.46 | -1.60 | -1.02 | -1.01 | 1.03  | -1.24 | 1.08  |
| miR-139-5p  | -2.37        | -3.88 | 1.16                  | -1.09 | 1.19  | 2.05  | 1.52  | n/d     | n/d   | n/d   | n/d   | n/d   | n/d   | n/d   | n/d   | n/d   | n/d   |
| miR-183-5p  | -1.58        | -2.02 | 1.54                  | 1.48  | 1.54  | 1.89  | 2.25  | -1.05   | -1.11 | -1.21 | 1.40  | 1.07  | -1.34 | -1.60 | -1.55 | 1.05  | -1.10 |
| miR-185-5p  | 1.25         | 1.08  | 1.23                  | 1.00  | 1.05  | 1.61  | -1.00 | -1.14   | -1.54 | -1.10 | -1.05 | -1.22 | 1.17  | 1.11  | 1.19  | 1.13  | -1.13 |
| miR-193a-3p | -2.31        | -1.35 | 1.34                  | 1.53  | -1.23 | 2.41  | 1.14  | 1.19    | 1.06  | -1.10 | -1.03 | -1.04 | 1.31  | -1.10 | -1.41 | 2.29  | 1.61  |
| miR-324-5p  | -1.02        | -1.15 | -2.02                 | -1.66 | -2.08 | -1.79 | -2.65 | -1.11   | -1.58 | -1.34 | -1.41 | -1.59 | -1.14 | -1.50 | -1.44 | -1.33 | -1.31 |
| miR-339-5p  | -1.59        | -1.77 | 1.11                  | -1.16 | -1.20 | -1.29 | -2.17 | 1.14    | 1.04  | 1.08  | -1.04 | -1.38 | -1.09 | -1.22 | 1.09  | -1.33 | -1.62 |
| miR-340-5p  | -1.17        | -1.30 | -1.85                 | -1.71 | -1.89 | -1.72 | -3.35 | 1.03    | -1.34 | -1.08 | -1.06 | -1.30 | -1.07 | -1.23 | -1.58 | -1.15 | -1.30 |
| miR-424-3p  | -1.99        | -2.72 | -1.10                 | -1.11 | -1.04 | -1.30 | -1.68 | -1.89   | 1.11  | 1.12  | 1.33  | -1.54 | -1.23 | -1.04 | -1.37 | -1.16 | -1.42 |
| miR-486-3p  | -1.26        | -7.27 | -2.98                 | -3.68 | -2.31 | -1.83 | -2.13 | n/d     | n/d   | n/d   | n/d   | n/d   | n/d   | n/d   | n/d   | n/d   | n/d   |
| miR-486-5p  | -10.1        | -8.83 | -1.51                 | -1.70 | -1.63 | -2.78 | -7.39 | -2.84   | -1.41 | -2.57 | -3.22 | -10.9 | -1.44 | -1.57 | -1.25 | -5.47 | -7.34 |
| miR-491-5p  | -1.54        | -3.19 | 1.28                  | 1.33  | 1.83  | 1.11  | 1.22  | -1.57   | 1.01  | -1.10 | -1.15 | 1.04  | 1.89  | 1.13  | 1.46  | 1.99  | 1.43  |
| miR-505-5p  | -1.74        | -1.71 | 1.12                  | -1.90 | -2.42 | -1.60 | -1.57 | n/d     | n/d   | n/d   | n/d   | n/d   | n/d   | n/d   | n/d   | n/d   | n/d   |
| miR-605-5p  | -1.84        | -1.39 | -1.69                 | -2.41 | -1.23 | -1.57 | -1.03 | 1.38    | -1.03 | 1.34  | 1.15  | -1.13 | -1.76 | -1.58 | -1.48 | -1.32 | -1.84 |
| miR-628-5p  | 1.57         | 1.22  | -2.15                 | -2.44 | -2.48 | -1.79 | -1.55 | 1.51    | -1.08 | -1.29 | 1.02  | -1.09 | 1.01  | -1.11 | -1.29 | 1.08  | -1.16 |
| miR-766-3p  | -1.05        | -1.34 | 1.73                  | 1.16  | -1.10 | 1.25  | -1.16 | 1.58    | 1.30  | 1.11  | 1.12  | -1.23 | 1.55  | -1.08 | 1.22  | 1.34  | -2.13 |
| miR-1275    | -1.56        | -1.83 | 1.65                  | -1.03 | 1.21  | 1.80  | 1.46  | 1.43    | 1.31  | 1.22  | 1.84  | 1.56  | 1.39  | 1.05  | 1.16  | 1.43  | 1.09  |
| miR-1290    | -3.06        | -1.42 | 1.08                  | -1.04 | 1.18  | 1.17  | 1.21  | 1.30    | 1.57  | 2.48  | 2.20  | 3.37  | -1.26 | -1.20 | 1.42  | -1.14 | -1.03 |

## Supplementary Table 5 (Table S5)

Top significantly enriched pathways (Reactome) and biological processes (GO:BP) associated with target genes of dysregulated miRNAs in untreated PEO1-OR cells.

| Cell Line: PEO1-OR<br>Treatment: Basal expression (in the absence of inhibitors) |                                                                |                       |            |                                                                                |
|----------------------------------------------------------------------------------|----------------------------------------------------------------|-----------------------|------------|--------------------------------------------------------------------------------|
| #                                                                                | Reactome pathway                                               | Adj. p value          | Hit number | Target genes                                                                   |
| 1                                                                                | Signaling by FGFR                                              | $1.21 \times 10^{-6}$ | 8          | UBC, TNRC6A, TNRC6B, MTOR, CREB1, CDKN1A, CALM1, PTEN                          |
| 2                                                                                | Signaling by EGFR                                              | $2.16 \times 10^{-6}$ | 8          | UBC, TNRC6A, TNRC6B, MTOR, CREB1, CDKN1A, CALM1, PTEN                          |
| 3                                                                                | PIP3 activates AKT signaling                                   | $6.77 \times 10^{-6}$ | 6          | TNRC6A, TNRC6B, MTOR, CREB1, CDKN1A, PTEN,                                     |
| 4                                                                                | PI3K/AKT activation                                            | $7.29 \times 10^{-6}$ | 6          | TNRC6A, TNRC6B, MTOR, CREB1, CDKN1A, PTEN                                      |
| 5                                                                                | Signaling by PDGF                                              | $1.49 \times 10^{-5}$ | 7          | TNRC6A, TNRC6B, MTOR, CREB1, CDKN1A, CALM1, PTEN,                              |
| 6                                                                                | Signaling by SCF-KIT                                           | $3.24 \times 10^{-5}$ | 6          | TNRC6A, TNRC6B, MTOR, CREB1, CDKN1A, PTEN                                      |
| 7                                                                                | Signaling by Wnt                                               | $9.81 \times 10^{-5}$ | 7          | UBC, TNRC6A, TNRC6B, CSNK1A1, CALM1, XPO1, CLTC                                |
| 8                                                                                | beta-catenin independent WNT signaling                         | $1.91 \times 10^{-4}$ | 5          | UBC, TNRC6A, TNRC6B, CALM1, CLTC                                               |
| 9                                                                                | Downregulation of TGF-beta receptor signaling                  | $3.50 \times 10^{-4}$ | 3          | UBC, XPO1, PPP1CB                                                              |
| 10                                                                               | Signaling by TGF-beta Receptor Complex                         | $4.24 \times 10^{-4}$ | 4          | UBC, XPO1, PPP1CB, SKI                                                         |
| 11                                                                               | Cyclin D associated events in G1                               | $5.02 \times 10^{-4}$ | 3          | UBC, CDKN1A, CDK6                                                              |
| 12                                                                               | TGF-beta receptor signaling activates SMADs                    | $5.68 \times 10^{-4}$ | 3          | UBC, XPO1, PPP1CB                                                              |
| 13                                                                               | Mitotic G1-G1/S phases                                         | $2.61 \times 10^{-4}$ | 4          | UBC, MCM4, CDKN1A, CDK6                                                        |
| 14                                                                               | Cell Cycle, Mitotic                                            | $6.51 \times 10^{-3}$ | 6          | UBC, MCM4, CDKN1A, XPO1, PPP1CB, CDK6                                          |
| 15                                                                               | DNA Replication                                                | $8.59 \times 10^{-3}$ | 3          | UBC, MCM4, CDKN1A                                                              |
| #                                                                                | GO: Biological process                                         | Adj. p value          | Hit number | Target genes                                                                   |
| 1                                                                                | EGFR signaling pathway                                         | $1.32 \times 10^{-3}$ | 5          | UBC, MTOR, CREB1, PTEN, CLTC                                                   |
| 2                                                                                | regulation of TGF-beta receptor signaling pathway              | $2.02 \times 10^{-3}$ | 4          | UBC, XPO1, PPP1CB, SKI                                                         |
| 3                                                                                | G1/S transition of mitotic cell cycle                          | $2.11 \times 10^{-3}$ | 5          | UBC, MCM4, CDKN1A, PTEN, CDK6                                                  |
| 4                                                                                | cellular response to stress                                    | $3.75 \times 10^{-3}$ | 12         | UBC, TERF2, TNRC6A, MTOR, CREB1, VCP, NDRG1, EGR1, CDKN1A, FEM1B, CDK6, HUWE1, |
| 5                                                                                | cell cycle checkpoint                                          | $4.35 \times 10^{-3}$ | 5          | UBC, NDRG1, MCM4, CDKN1A, FEM1B                                                |
| 6                                                                                | Notch signaling pathway                                        | $5.74 \times 10^{-3}$ | 4          | UBC, TNRC6A, TNRC6B, CDK6                                                      |
| 7                                                                                | negative regulation of cellular metabolic process              | $8.31 \times 10^{-3}$ | 11         | UBC, TERF2, TNRC6A, MTOR, CREB1, ATXN1, EGR1, CDKN1A, XPO1, PTEN, SKI          |
| 8                                                                                | DNA damage response, signal transduction by p53 class mediator | $8.48 \times 10^{-3}$ | 3          | UBC, NDRG1, CDKN1A                                                             |
| 9                                                                                | signal transduction in response to DNA damage                  | $9.14 \times 10^{-3}$ | 3          | UBC, NDRG1, CDKN1A                                                             |
| 10                                                                               | DNA damage checkpoint                                          | $9.55 \times 10^{-3}$ | 3          | UBC, CDKN1A, FEM1B                                                             |
| 11                                                                               | response to DNA damage stimulus                                | $9.55 \times 10^{-3}$ | 7          | UBC, TERF2, VCP, NDRG1, CDKN1A, FEM1B, HUWE1                                   |
| 12                                                                               | S phase of mitotic cell cycle                                  | $9.55 \times 10^{-3}$ | 3          | UBC, MCM4, CDKN1A,                                                             |
| 13                                                                               | DNA integrity checkpoint                                       | $9.92 \times 10^{-3}$ | 3          | UBC, CDKN1A, FEM1B                                                             |
| 14                                                                               | negative regulation of cell cycle                              | $1.24 \times 10^{-2}$ | 5          | UBC, MCM4, CDKN1A, PTEN, CDK6                                                  |
| 15                                                                               | positive regulation of cell proliferation                      | $1.49 \times 10^{-2}$ | 6          | ESR1, MTOR, EGR1, CDKN1A, PTEN, CDK6                                           |

## Supplementary Table 6 (Table S6)

Top significantly enriched pathways (Reactome) associated with target genes of dysregulated miRNAs in PEO1-OR cells in response to combinations of olaparib with the ATR/CHK1 pathway inhibitors.

|    |                                                                | Cell Line:   | PEO1-OR                                                   |                            |  |
|----|----------------------------------------------------------------|--------------|-----------------------------------------------------------|----------------------------|--|
|    |                                                                | Treatment:   | Olaparib combination with ATRi or CHK1i (O + A and O + C) |                            |  |
| #  | Reactome pathway                                               | Adj. p value | Hit number                                                | Target genes               |  |
| 1  | beta-catenin independent WNT signaling                         | 0.0252       | 3                                                         | <i>TNRC6A, CALM1, CLTC</i> |  |
| 2  | Loss of Function of TGFBR1 in Cancer                           | 0.0406       | 1                                                         | <i>SMAD2</i>               |  |
| 3  | Post-transcriptional silencing by small RNAs                   | 0.0406       | 1                                                         | <i>TNRC6A</i>              |  |
| 4  | Signaling by TGF-beta Receptor Complex in Cancer               | 0.0406       | 1                                                         | <i>SMAD2</i>               |  |
| 5  | Caspase-mediated cleavage of cytoskeletal proteins             | 0.0406       | 1                                                         | <i>VIM</i>                 |  |
| 6  | Chk1/Chk2(Cds1) mediated inactivation of Cyclin B:Cdk1 complex | 0.0406       | 1                                                         | <i>YWHAQ</i>               |  |
| 7  | G2/M DNA damage checkpoint                                     | 0.0406       | 1                                                         | <i>YWHAQ</i>               |  |
| 8  | MicroRNA (miRNA) biogenesis                                    | 0.0406       | 1                                                         | <i>POLR2A</i>              |  |
| 9  | Downregulation of TGF-beta receptor signaling                  | 0.0406       | 1                                                         | <i>SMAD2</i>               |  |
| 10 | VEGFR2 mediated cell proliferation                             | 0.0406       | 1                                                         | <i>CALM1</i>               |  |
| 11 | Transcriptional regulation by small RNAs                       | 0.0406       | 2                                                         | <i>TNRC6A, POLR2A</i>      |  |
| 12 | Downstream signaling of activated FGFR1                        | 0.0406       | 2                                                         | <i>TNRC6A, CALM1</i>       |  |
| 13 | Signaling by EGFR                                              | 0.0406       | 2                                                         | <i>TNRC6A, CALM1</i>       |  |
| 14 | Signaling by PDGF                                              | 0.0406       | 2                                                         | <i>TNRC6A, CALM1</i>       |  |
| 15 | NGF signaling via TRKA from the plasma membrane                | 0.0406       | 2                                                         | <i>TNRC6A, CALM1</i>       |  |



## Supplementary Table 7 (Table S7)

Experimentally validated targets of differentially expressed miRNAs from minimal subnetworks that maximally connect seeds in the PEO1-OR cell line (established with miRNet 2.0).

| Basal expression<br>(in the absence of inhibitors) |                                                                                                                                                      | Olaparib combinations with ATRi or CHK1i<br>(O + A and O + C) |                                                 |
|----------------------------------------------------|------------------------------------------------------------------------------------------------------------------------------------------------------|---------------------------------------------------------------|-------------------------------------------------|
| miRNA                                              | Target genes                                                                                                                                         | miRNA                                                         | Target genes                                    |
| miR-9-5p                                           | <i>UBC, TNRC6A, CSNK1A1, ESR1, CREB1, NDRG1, DDX21, ITGA5, EGR1, MCM4, CDKN1A, NRC1, CALM1, XPO1, SRRM2, PPP1CB, VIM, CLTC, VPS4A, HUWE1, HECTD1</i> | miR-33a-3p                                                    | <i>TNRC6A, DDX21, CAB39, CALM1, IRF4</i>        |
| miR-95-3p                                          | <i>MTOR, CREB1, MCM4, CDKN1A, CALM1, SRRM2, VIM, SKI, ZNF131</i>                                                                                     | miR-95-3p                                                     | <i>POLR2A, CALM1, SRRM2, VIM, SCAF4, ZNF131</i> |
| miR-99b-5p                                         | <i>TNRC6B, MTOR, ITGA5, MCM4, XPO1, MGA, PPP1CB, VPS4A</i>                                                                                           | miR-324-5p                                                    | <i>TNRC6A, SMAD2, POLR2A, YWHAQ</i>             |
| miR-100-3p                                         | <i>FN1, PNRC1, SMARCC1, PPP1CB, HNRNPH1, SKI, HECTD1</i>                                                                                             | miR-424-3p                                                    | <i>TNRC6A, VIM, UBE2Z, CLTC</i>                 |
| miR-100-5p                                         | <i>CDKN1A, EEF1D, PNRC1, MGA, PPP1CB, FEM1B, CDK6</i>                                                                                                | miR-486-5p                                                    | <i>DDX21, SMAD2, SRRM2, VIM, PUM2</i>           |
| miR-125a-3p                                        | <i>UBC, TERF2, FN1, EGR1, MCM4, EEF1D, SRRM2, PPP1CB, CDK6, ARPC2, HUWE1, SKI</i>                                                                    | miR-1275                                                      | <i>SMAD2, IRF4, UBE2Z, SCAF4, RPP25</i>         |
| miR-193a-3p                                        | <i>FN1, TNRC6B, ESR1, ATXN1, ARF6, CALM1, PTEN, CLTC, CDK6, HECTD1</i>                                                                               | miR-1290                                                      | <i>CAB39, YWHAQ, PUM2, CLTC, RPP25, ZNF131</i>  |
| miR-424-3p                                         | <i>TNRC6A, CSNK1A1, MGA, SMARCC1, VIM, PTEN, CLTC, CDK6, ARPC2, HUWE1</i>                                                                            |                                                               |                                                 |
| miR-486-5p                                         | <i>TERF2, DDX21, ARF6, XPO1, SRRM2, VIM, PTEN, FEM1B, HNRNPH1</i>                                                                                    |                                                               |                                                 |
| miR-505-5p                                         | <i>TNRC6B, CSNK1A1, EGR1, CDKN1A, EEF1D, SRRM2, HUWE1, SKI</i>                                                                                       |                                                               |                                                 |
| miR-1290                                           | <i>VCP, NDRG1, ATXN1, FEM1B, CLTC, VPS4A, ARPC2, HUWE1, ZNF131, HECTD1</i>                                                                           |                                                               |                                                 |

## Supplementary Table 8 (Table S8)

**Identification of hub nodes using CytoHubba plug-in based on the minimal miRNA-mRNA networks using maximal clique centrality (MCC) algorithm.** The top 10 hub miRNA targets with the highest connectivity were assigned as potential hub genes (underlined). O – olaparib, A – ATRi, C – CHK1i.

| PEO1-OR<br>(untreated) |               |       | PEO1-OR<br>(O + A and O + C) |               |       | PEO1<br>(O + A and O + C) |                |       |
|------------------------|---------------|-------|------------------------------|---------------|-------|---------------------------|----------------|-------|
| Rank                   | Node name     | Score | Rank                         | Node name     | Score | Rank                      | Node name      | Score |
| 1                      | <u>UBC</u>    | 274   | 1                            | miR-486-5p    | 6     | 1                         | <u>UBC</u>     | 229   |
| 2                      | miR-9-5p      | 138   | 1                            | <u>SRRM2</u>  | 6     | 2                         | <u>FN1</u>     | 222   |
| 3                      | <u>ESR1</u>   | 126   | 1                            | miR-1290      | 6     | 3                         | <u>ELAVL1</u>  | 204   |
| 4                      | <u>SRRM2</u>  | 94    | 1                            | <u>VIM</u>    | 6     | 4                         | <u>YWHAG</u>   | 144   |
| 5                      | <u>VCP</u>    | 80    | 1                            | miR-95-3p     | 6     | 5                         | <u>SRSF1</u>   | 129   |
| 6                      | <u>DDX21</u>  | 64    | 6                            | miR-33a-3p    | 5     | 6                         | <u>CAND1</u>   | 96    |
| 7                      | <u>VIM</u>    | 63    | 6                            | <u>YWHAQ</u>  | 5     | 7                         | hsa-let-7f-5p  | 80    |
| 8                      | <u>CALM1</u>  | 51    | 6                            | miR-1275      | 5     | 8                         | <u>HNRNPH1</u> | 51    |
| 9                      | <u>FN1</u>    | 46    | 9                            | miR-324-5p    | 4     | 9                         | miR-125a-3p    | 50    |
| 10                     | <u>CDKN1A</u> | 42    | 9                            | <u>CALM1</u>  | 4     | 10                        | <u>MYC</u>     | 36    |
| 11                     | <u>HUWE1</u>  | 36    | 9                            | miR-424-3p    | 4     | 11                        | <u>CDKN1B</u>  | 26    |
| 12                     | miR-125a-3p   | 32    | 9                            | <u>DDX21</u>  | 4     | 12                        | <u>ACTN4</u>   | 22    |
| 13                     | EEF1D         | 27    | 13                           | <u>SMAD2</u>  | 3     | 13                        | SMAD2          | 21    |
| 14                     | TERF2         | 24    | 13                           | <u>TNRC6A</u> | 3     | 14                        | ADNP           | 18    |
| 15                     | CLTC          | 21    | 13                           | <u>CLTC</u>   | 3     | 14                        | miR-101-3p     | 18    |
| 16                     | miR-100-5p    | 18    | 16                           | <u>SCAF4</u>  | 2     | 14                        | miR-324-5p     | 18    |
| 17                     | EGR1          | 17    | 16                           | <u>POLR2A</u> | 2     | 17                        | miR-139-5p     | 16    |
| 18                     | CREB1         | 16    | 16                           | RPP25         | 2     | 17                        | miR-183-5p     | 16    |
| 18                     | NDRG1         | 16    | 16                           | CAB39         | 2     | 17                        | CRK            | 16    |
| 20                     | CDK6          | 15    | 16                           | ZNF131        | 2     | 20                        | SEC24C         | 15    |
| 20                     | ARF6          | 15    | 16                           | IRF4          | 2     | 21                        | RHOA           | 13    |
| 22                     | SMARCC1       | 14    | 16                           | PUM2          | 2     | 22                        | miR-340-5p     | 10    |
| 22                     | miR-193a-3p   | 14    | 16                           | UBE2Z         | 2     | 23                        | PIK3R1         | 9     |
| 22                     | miR-486-5p    | 14    |                              |               | 6     | 23                        | VIM            | 9     |
| 25                     | miR-1290      | 13    |                              |               | 6     | 23                        | TERF2          | 9     |
| 26                     | miR-95-3p     | 11    |                              |               |       | 23                        | TNRC6B         | 9     |
| 27                     | XPO1          | 10    |                              |               |       | 23                        | NOTCH1         | 9     |
| 27                     | HNRNPH1       | 10    |                              |               |       | 23                        | PLCG1          | 9     |
| 27                     | miR-424-3p    | 10    |                              |               |       | 29                        | miR-193a-3p    | 8     |
| 30                     | miR-99b-5p    | 8     |                              |               |       | 30                        | miR-135b-3p    | 7     |
| 30                     | miR-505-5p    | 8     |                              |               |       | 30                        | miR-486-5p     | 7     |
| 32                     | PPP1CB        | 7     |                              |               |       | 32                        | RBM28          | 6     |
| 32                     | PTEN          | 7     |                              |               |       | 32                        | TNRC6A         | 6     |
| 32                     | ARPC2         | 7     |                              |               |       | 32                        | miR-25-5p      | 6     |
| 32                     | SKI           | 7     |                              |               |       | 32                        | miR-100-3p     | 6     |
| 32                     | miR-100-3p    | 7     |                              |               |       | 32                        | NF2            | 6     |
| 32                     | ITGA5         | 7     |                              |               |       | 37                        | FBXW7          | 5     |
| 38                     | MTOR          | 6     |                              |               |       | 37                        | ZNF652         | 5     |
| 38                     | MCM4          | 6     |                              |               |       | 37                        | ATXN1L         | 5     |
| 40                     | HECTD1        | 5     |                              |               |       | 40                        | UBE2Z          | 4     |
| 40                     | TNRC6B        | 5     |                              |               |       | 40                        | NHLRC2         | 4     |
| 40                     | ATXN1         | 5     |                              |               |       | 40                        | ITSN2          | 4     |
| 43                     | MGA           | 4     |                              |               |       | 43                        | VPS37A         | 3     |
| 43                     | FEM1B         | 4     |                              |               |       |                           |                |       |
| 43                     | VPS4A         | 4     |                              |               |       |                           |                |       |
| 43                     | CSNK1A1       | 4     |                              |               |       |                           |                |       |
| 43                     | PNRC1         | 4     |                              |               |       |                           |                |       |
| 48                     | ZNF131        | 3     |                              |               |       |                           |                |       |
| 48                     | TNRC6A        | 3     |                              |               |       |                           |                |       |

## Supplementary Table 9 (Table S9)

Results of stage-wise differential miRNA and gene expression analysis in serous OC patients using filtered data from TCGA-OV dataset (serous OC patients with stage II, III, or IV after pharmaceutical therapy). Gene and miRNA levels were expressed as counts per million (CPM). Statistical significance for non-normally distributed data was evaluated with the Kruskal-Wallis test comparing the medians of three groups followed by Dunn's multiple comparison test (if applicable).

| miRNA       | Average expression (CPM) |           |          | Median expression (CPM) |           |          | Kruskal-Wallis test<br><i>p</i> value |
|-------------|--------------------------|-----------|----------|-------------------------|-----------|----------|---------------------------------------|
|             | Stage II                 | Stage III | Stage IV | Stage II                | Stage III | Stage IV |                                       |
| miR-9-5p    | 41.6                     | 38.7      | 27.5     | 57.2                    | 59.1      | 33.8     | 0.2384                                |
| miR-99b-5p  | 226675                   | 262851    | 242556   | 240102                  | 265850    | 231672   | 0.4013                                |
| miR-100-5p  | 1848                     | 2982      | 2238     | 1932                    | 2395      | 2141     | 0.2324                                |
| miR-125a-3p | 39.8                     | 43.2      | 49.1     | 36.3                    | 37.7      | 41.4     | 0.4617                                |
| miR-324-5p  | 47.4                     | 43.6      | 45.6     | 44.4                    | 38.9      | 39.6     | 0.9585                                |
| miR-424-3p  | 11.9                     | 14.6      | 14.2     | 9.8                     | 12.2      | 12.1     | 0.5566                                |
| miR-486-5p  | 492.9                    | 512.6     | 346.2    | 328.1                   | 372.9     | 231.1    | 0.3533                                |
| miR-505-5p  | 35.4                     | 23.2      | 23.1     | 34.5                    | 21.3      | 20.6     | 0.2263                                |

  

| Gene           | Average expression (CPM) |           |          | Median expression (CPM) |           |          | Kruskal-Wallis test<br><i>p</i> value |
|----------------|--------------------------|-----------|----------|-------------------------|-----------|----------|---------------------------------------|
|                | Stage II                 | Stage III | Stage IV | Stage II                | Stage III | Stage IV |                                       |
| <i>HUWE1</i>   | 385.5                    | 379.6     | 371.3    | 358.1                   | 352.8     | 397.5    | 0.9030                                |
| <i>TNRC6B</i>  | 74.7                     | 56.2      | 54.2     | 70.6                    | 55.6      | 50.2     | 0.0647                                |
| <i>EEF1D</i>   | 129.7                    | 112.8     | 126.6    | 121.3                   | 109.7     | 113.7    | 0.6075                                |
| <i>CDK6</i>    | 28.0                     | 24.2      | 40.9     | 16.0                    | 19.6      | 33.6     | 0.0255                                |
| <i>CSNK1A1</i> | 86.0                     | 79.1      | 84.4     | 89.4                    | 75.7      | 83.9     | 0.3994                                |
| <i>EGR1</i>    | 297.0                    | 276.4     | 177.9    | 272.0                   | 211.0     | 148.9    | 0.2884                                |
| <i>CDKN1A</i>  | 54.6                     | 51.8      | 41.7     | 44.9                    | 45.17     | 39.8     | 0.4951                                |
| <i>ITGA5</i>   | 47.02                    | 61.1      | 49.24    | 35.5                    | 47.5      | 41.8     | 0.4789                                |
| <i>SRRM2</i>   | 973.8                    | 754.7     | 756.4    | 933.1                   | 745.0     | 754.6    | 0.0975                                |
| <i>PTEN</i>    | 89.1                     | 101.2     | 94.6     | 88.0                    | 96.7      | 103.0    | 0.6343                                |
| <i>SMARCC1</i> | 220.0                    | 177.5     | 175.5    | 208.6                   | 170.9     | 185.3    | 0.1008                                |
| <i>MGA</i>     | 54.5                     | 48.1      | 49.3     | 52.0                    | 47.0      | 51.1     | 0.3749                                |
| <i>VIM</i>     | 239.8                    | 418.0     | 390.1    | 250.2                   | 360.9     | 361.8    | 0.0271                                |
| <i>TNRC6A</i>  | 76.7                     | 58.8      | 58.93    | 67.2                    | 55.9      | 53.1     | 0.0373                                |
| <i>YWHAQ</i>   | 400.7                    | 438.7     | 421.2    | 395.2                   | 407.4     | 352.2    | 0.6053                                |
| <i>CLTC</i>    | 298.1                    | 285.6     | 299.9    | 295.3                   | 271.2     | 260.3    | 0.8709                                |
| <i>UBE2Z</i>   | 158.6                    | 157.4     | 150.3    | 156.9                   | 150.3     | 137.7    | 0.7519                                |
| <i>SMAD2</i>   | 158.6                    | 157.4     | 150.3    | 156.9                   | 150.3     | 137.7    | 0.7519                                |
| <i>POLR2A</i>  | 271.0                    | 220.4     | 195.1    | 270.2                   | 207.3     | 186.0    | 0.0074                                |

## Supplementary Table 10 (Table S10)

**Validation of endogenous control genes stable expression in HGSOC cell lines for RT-qPCR data normalization from Custom TaqMan™ MicroRNA Cards.** Average  $C_T$  values are means for all tested treatments (control, O, A, C, O+A, and O+C) among cell lines. Significant differences in average  $C_T$  values between treatments for each gene and cell line were evaluated with ordinary one-way ANOVA. O – olaparib, A – ATRi, C – CHK1i.

| Endogenous Control | Cell Line | Average $C_T$ | SD of $C_T$ | Significant Difference Among Treatments | $C_T$ MIN | $C_T$ MAX | $C_T$ Range |
|--------------------|-----------|---------------|-------------|-----------------------------------------|-----------|-----------|-------------|
| U6 snRNA           | PEO1      | 20.10         | 0.14        | NO ( $p = 0.6844$ )                     | 19.91     | 20.29     | 0.38        |
|                    | PEO4      | 20.00         | 0.22        | NO ( $p = 0.6553$ )                     | 19.52     | 20.16     | 0.64        |
|                    | PEO1-OR   | 20.18         | 0.07        | NO ( $p = 0.9734$ )                     | 20.06     | 20.26     | 0.20        |
| RNU48              | PEO1      | 20.34         | 0.08        | NO ( $p = 0.9480$ )                     | 20.24     | 20.47     | 0.24        |
|                    | PEO4      | 20.09         | 0.10        | NO ( $p = 0.8417$ )                     | 20.00     | 20.29     | 0.29        |
|                    | PEO1-OR   | 20.08         | 0.08        | NO ( $p = 0.6809$ )                     | 19.98     | 20.17     | 0.19        |
| miR-30e-3p         | PEO1      | 27.73         | 0.22        | NO ( $p = 0.2772$ )                     | 27.34     | 28.01     | 0.67        |
|                    | PEO4      | 27.46         | 0.17        | NO ( $p = 0.6857$ )                     | 27.18     | 27.67     | 0.50        |
|                    | PEO1-OR   | 27.34         | 0.12        | NO ( $p = 0.9296$ )                     | 27.12     | 27.51     | 0.39        |
